# Supplementary material for: Water-promoted dehydrative coupling of 2-aminopyridines in heptane via a borrowing hydrogen strategy
Source: Royal Society of Chemistry journal article supplement (doi:10.1039/d1ra04118e), 2021-01-01
Supplement: d1ra04118e1.pdf [file d1ra04118e1.pdf]

## Supporting Information

### Water-promoted dehydrative N-benylation of 2-aminopyridines in heptane via borrowing hydrogen methodology

Taku Nakayama, Hidemasa Hikawa\*, Shoko Kikkawa and Isao Azumaya\*

*Faculty of Pharmaceutical Sciences, Toho University, Funabashi, Chiba 274-8510, Japan*

*hidemasa.hikawa@phar.toho-u.ac.jp and isao.azumaya@phar.toho-u.ac.jp*

|                                                                                                                                     |                |
|-------------------------------------------------------------------------------------------------------------------------------------|----------------|
| <b>Table of contents</b>                                                                                                            | <b>S1</b>      |
| <b>General methods</b>                                                                                                              | <b>S2</b>      |
| <b>Scheme S1. General procedure and characterization of all compounds.</b>                                                          | <b>S2-8</b>    |
| <b>Table S1. Effects of catalysts and solvents.</b>                                                                                 | <b>S9</b>      |
| <b>Scheme S2. Reaction time course.</b>                                                                                             | <b>S10</b>     |
| <b>Scheme S3. Comparison of reaction rates in heptane with the addition of H<sub>2</sub>O (1 mmol) vs. D<sub>2</sub>O (1 mmol).</b> | <b>S11</b>     |
| <b>Scheme S4. Comparison of reaction rates in H<sub>2</sub>O vs. in D<sub>2</sub>O.</b>                                             | <b>S12</b>     |
| <b>Scheme S5. Crossover experiment.</b>                                                                                             | <b>S13-15</b>  |
| <b>Scheme S6. Kinetic isotope effect.</b>                                                                                           | <b>S16</b>     |
| <b>Scheme S7 Dehydrative benzylation of aniline.</b>                                                                                | <b>S17</b>     |
| <b>Scheme S8. Deuterium incorporation into the benzylic position.</b>                                                               | <b>S18-19</b>  |
| <b>Scheme S9. Scale-up experiment.</b>                                                                                              | <b>S20</b>     |
| <b>Copies of <sup>1</sup>H and <sup>13</sup>C NMR spectra of all compounds</b>                                                      | <b>S18-S42</b> |

## General Methods.

All of the starting materials and solvents were purchased from Sigma–Aldrich Japan, FUJIFILM Wako Pure Chemical Co., Nacalai Tesque, Inc., and TCI Co., Ltd. All commercially available reagents and solvents (guaranteed reagents) were used without further purification. CHROMATOREX Q-PACK SI50 (Fuji Silysia Chemical Ltd, Japan) was used for flash column chromatography. All melting points were determined using a Yanako micro melting point apparatus without correction. <sup>1</sup>H NMR (400 MHz) and <sup>13</sup>C NMR (100 MHz) spectra were recorded on a JEOL ECS400 spectrometer. IR spectra were measured with a JASCO FT/IR-4100 spectrometer. Mass spectra were obtained using a JEOL the JMS-700 MStation Mass Spectrometer.

### Scheme S1. General procedures.

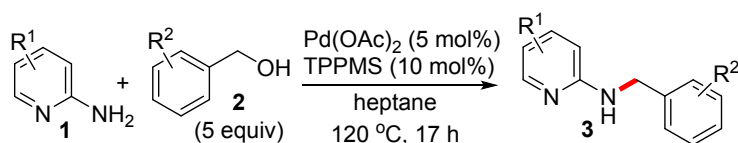

**General procedure I:** A mixture of 2-aminopyridines **1** (1 mmol), palladium(II) acetate (12 mg, 0.05 mmol), sodium diphenylphosphinobenzene-3-sulfonate (TPPMS, 36 mg, 0.1 mmol) and benzylic alcohols **2** (5 mmol) in heptane (4 mL) was heated at 120 °C for 17 h in a sealed tube under air. After cooling, the reaction mixture was poured into water and extracted with EtOAc. The organic layer was washed with brine, dried over MgSO<sub>4</sub> and concentrated in vacuo. The residue was purified by flash column chromatography (silica gel, hexane/EtOAc) to give desired product **3**.

**General procedure II:** A mixture of 2-aminopyridines **1** (1 mmol), palladium(II) acetate (24 mg, 0.1 mmol), sodium diphenylphosphinobenzene-3-sulfonate (TPPMS, 72 mg, 0.2 mmol) and benzylic alcohols **2** (5 mmol) in octane (4 mL) was heated at 150 °C for 24 h in a sealed tube under air. After cooling, the reaction mixture was poured into water and extracted with EtOAc. The organic layer was washed with brine, dried over MgSO<sub>4</sub> and concentrated in vacuo. The residue was purified by flash column chromatography (silica gel, hexane/EtOAc) to give desired product **3**.

### *N*-Benzyl-5-(trifluoromethyl)pyridin-2-amine **3a**<sup>1</sup>

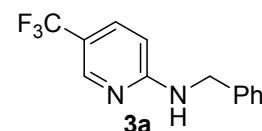

A mixture of 2-amino-5-(trifluoromethyl)pyridine (**1a**) (1.13 g, 7.0 mmol), palladium(II) acetate (78.6 mg, 0.35 mmol), sodium diphenylphosphinobenzene-3-sulfonate (TPPMS, 254.7 mg, 0.7 mmol) and benzyl alcohol (**2a**) (5 mmol) in heptane (28 mL) was heated at 120 °C for 17 h in a sealed tube under air. After cooling, the reaction mixture was poured into water and extracted with EtOAc. The organic layer was washed with brine, dried over MgSO<sub>4</sub> and concentrated in vacuo. The residue was triturated with hexane to give desired product **3a** (1.56 g, 6.2 mmol, 88%) as a white solid.

mp 157–159 °C; IR (KBr) (cm<sup>-1</sup>) 3230, 3030, 1618; <sup>1</sup>H-NMR (400 MHz, CDCl<sub>3</sub>): δ 4.56 (d, *J* = 7.7 Hz, 2H), 5.26 (s, 1H), 6.40 (d, *J* = 8.9 Hz, 1H), 7.27–7.38 (m, 5H), 7.57 (dd, *J* = 8.8, 2.3 Hz, 4H), 8.35 (s, 1H); <sup>13</sup>C-NMR (100 MHz, CDCl<sub>3</sub>) δ 46.1, 106.1, 115.8 (q, *J*<sub>CF</sub> = 32.6 Hz), 124.5 (q, *J*<sub>CF</sub> = 270.3 Hz), 127.4, 127.6, 128.8, 134.5 (q, *J*<sub>CF</sub> = 2.9 Hz), 138.2, 146.1 (q, *J*<sub>CF</sub> = 3.8 Hz), 160.2; MS (FAB): *m/z* 253 [M+H]<sup>+</sup>.

#### *N*-Benzyl-5-fluoropyridin-2-amine **3b**<sup>1</sup>

Following the general procedure I, **3b** was obtained as a white solid. Yield 161

mg (79%); mp 101–102 °C; IR (KBr) (cm<sup>-1</sup>) 3245, 3030, 1537, 1455 ; <sup>1</sup>H-NMR (400 MHz, CDCl<sub>3</sub>): δ 4.47 (d, *J* = 5.7 Hz, 2H), 4.80 (s, 1H), 6.33 (dd, *J* = 8.9, 3.4 Hz, 1H), 7.18 (ddd, *J* = 8.5, 3.0, 0.9 Hz, 1H), 7.27–7.37 (m, 5H), 7.97 (d, *J* = 3.0 Hz, 1H); <sup>13</sup>C-NMR (100 MHz, CDCl<sub>3</sub>) δ 46.8, 107.1 (d, *J*<sub>CF</sub> = 3.8 Hz), 125.2 (d, *J*<sub>CF</sub> = 20.1 Hz) 127.3 (d, *J*<sub>CF</sub> = 7.7 Hz), 128.6, 134.6, 134.9, 139.0, 153.5 (d, *J*<sub>CF</sub> = 241.5 Hz), 155.3 ; MS (FAB): *m/z* 203 [M+H]<sup>+</sup>.

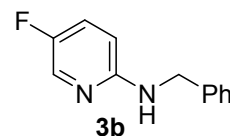

#### Methyl-6-(benzylamino)nicotinate **3c**<sup>1</sup>

Following the general procedure I, **3c** was obtained as a white solid. Yield

199 mg (82%); mp 156–158 °C; IR (KBr) (cm<sup>-1</sup>) 3224, 2993, 1704, 1607; <sup>1</sup>H-NMR (400 MHz, CDCl<sub>3</sub>): δ 3.87 (s, 3H), 4.58 (d, *J* = 6.0 Hz, 2H), 5.36 (s, 1H), 6.36 (dd, *J* = 0.7, 8.7 Hz, 1H), 7.27–7.38 (m, 5H), 7.99 (dd, *J* = 2.3, 8.7 Hz, 1H), 8.77 (dd, *J* = 0.5, 2.3 Hz, 1H); <sup>13</sup>C-NMR (100 MHz, CDCl<sub>3</sub>) δ 46.1, 51.7, 105.7, 115.5, 127.4, 127.6, 128.8, 138.1, 138.6, 151.5, 160.7, 166.4; MS (FAB): *m/z* 243 [M+H]<sup>+</sup>.

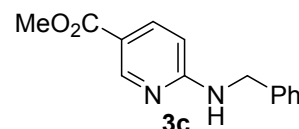

#### 6-(Benzylamino)nicotinamide **3d**<sup>1</sup>

Following the general procedure I, **3d** was obtained as a white solid. Yield

170 mg (75%); mp 169–171 °C; IR (KBr) (cm<sup>-1</sup>) 3399, 3203, 1644, 1604 ; <sup>1</sup>H-NMR (400 MHz, Methanol-*d*<sub>4</sub>): δ 4.57 (s, 2H), 6.54 (dd, *J* = 0.7, 8.9 Hz, 1H), 7.20–7.25 (m, 1H), 7.28–7.35 (m, 4H), 7.87 (dd, *J* = 2.5, 8.8 Hz, 1H), 8.53 (dd, *J* = 0.7, 2.5 Hz, 1H); <sup>13</sup>C-NMR (100 MHz, Methanol-*d*<sub>4</sub>) δ 46.1, 108.8, 118.7, 128.1, 128.4, 129.5, 137.7, 140.6, 149.8, 162.0, 171.1; MS (FAB): *m/z* 228 [M+H]<sup>+</sup>.

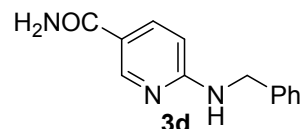

#### *N*-Benzyl-5-methylpyridin-2-amine **3e**<sup>1</sup>

Following the general procedure I, **3e** was obtained as a white solid. Yield 191

mg (96%); mp 108–110 °C; IR (KBr) (cm<sup>-1</sup>) 3235, 3027, 1611, 1536 ; <sup>1</sup>H-NMR (400 MHz, CDCl<sub>3</sub>): δ 2.17 (s, 3H), 4.48 (d, *J* = 6.0 Hz, 1H), 4.74 (s, 1H), 6.32 (d, *J* = 8.5 Hz, 1H), 7.22–7.37 (m, 6H), 7.93–7.94 (m, 1H); <sup>13</sup>C-NMR (100 MHz, CDCl<sub>3</sub>) δ 17.4, 46.5, 106.4, 121.9, 127.1, 127.3, 128.6, 138.5, 139.4, 147.7, 156.9; MS (FAB): *m/z* 199 [M+H]<sup>+</sup>.

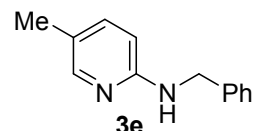

### ***N*-Benzylpyridin-2-amine 3f**<sup>1</sup>

Following the general procedure I, **3f** was obtained as a white solid. Yield 167 mg (90%); mp 91–93 °C; IR (KBr) (cm<sup>-1</sup>) 3229, 3028, 1599, 1574 ; <sup>1</sup>H-NMR (400 MHz, CDCl<sub>3</sub>): 4.51 (d, *J* = 5.7 Hz 2H), 4.88 (brs, 1H), 6.38 (d, *J* = 8.2 Hz, 1H), 6.59 (ddd, *J* = 0.9, 5.0, 7.1 Hz, 1H), 7.25-7.43 (m, 6H), 8.11 (ddd, *J* = 0.7, 1.8, 5.0 Hz, 1H); <sup>13</sup>C-NMR (100 MHz, CDCl<sub>3</sub>) δ 46.3, 106.8, 113.1, 127.2, 127.4, 128.6, 137.5, 139.1, 148.2, 158.6; MS (FAB): *m/z* 185 [M+H]<sup>+</sup>.

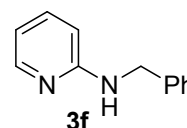

### ***N*-Benzyl-5-nitropyridin-2-amine 3g**<sup>2</sup>

Following the general procedure I, **3g** was obtained as a white solid. Yield 62 mg (27%); mp 129–131 °C; IR (KBr) (cm<sup>-1</sup>) 3210, 3068, 2984, 1608 ; <sup>1</sup>H-NMR (400 MHz, CDCl<sub>3</sub>): δ 4.64 (d, *J* = 5.3 Hz, 2H), 5.68 (s, 1H), 6.37 (dd, *J* = 9.2, 0.5 Hz, 3H), 7.30–7.39 (m, 5H), 8.20 (dd, *J* = 9.3, 2.5 Hz, 1H), 9.03 (d, *J* = 2.5 Hz, 1H); <sup>13</sup>C-NMR (100 MHz, CDCl<sub>3</sub>) δ 46.3, 127.5, 127.9, 128.9, 133.1, 136.1, 146.9, 161.0; MS (FAB): *m/z* 198 [M+H]<sup>+</sup>.

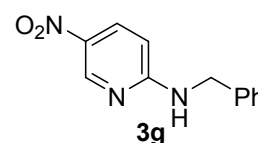

### **6-Benzylaminonicotinicacid 3h**<sup>3</sup>

Following the general procedure I, **3h** was obtained as a white solid. Yield 16 mg (7%) as a white solid; mp 214–222 °C; IR (KBr) (cm<sup>-1</sup>) 3278, 1614, 1555 ; <sup>1</sup>H-NMR (400 MHz, CDCl<sub>3</sub>): δ 4.58 (s, 2H), 6.55 (d, *J* = 8.9 Hz, 1H), 7.21 – 7.36 (m, 5H), 7.92 (dd, *J* = 8.9, 2.3 Hz, 1H), 8.61 (dd, *J* = 2.2, 0.5 Hz, 1H); <sup>13</sup>C-NMR (100 MHz, CDCl<sub>3</sub>) 46.1, 116.1, 128.1, 128.4, 129.5, 139.3, 140.4, 152.0, 162.4, 169.3 ; MS (FAB): *m/z* 229 [M+H]<sup>+</sup>.

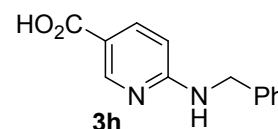

### ***N*-Benzylpyridin-3-amine 3i**<sup>1</sup>

Following the general procedure I, **3i** was obtained as a white solid. Yield 168 mg (88%); mp 87-89 °C; IR (KBr) (cm<sup>-1</sup>) 3264, 3032, 1591, 1529 ; <sup>1</sup>H-NMR (400 MHz, CDCl<sub>3</sub>): 4.15 (brs, 1H), 4.34 (s, 2H), 6.87 (ddd, *J* = 8.2, 3.0, 1.4 Hz, 1H), 7.07 (ddd, *J* = 8.5, 4.8, 0.7 Hz, 1H), 7.27-7.36 (m, 5H), 7.97 (dd, *J* = 4.7, 1.4 Hz, 1H), 8.07 (d, *J* = 2.8 Hz, 1H), ; <sup>13</sup>C-NMR (100 MHz, CDCl<sub>3</sub>) δ 47.9, 118.6, 123.7, 127.4, 127.5, 128.8, 136.1, 138.5, 138.9, 144.0; MS (FAB): *m/z* 185 [M+H]<sup>+</sup>.

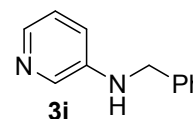

### ***N*-Benzylquinolin-2-amine 3j**<sup>4</sup>

Following the general procedure I, **3j** was obtained as a yellow solid. Yield 191 mg (82%); mp 98–100 °C; IR (KBr) (cm<sup>-1</sup>) 3272, 3061, 1622, 1572 ; <sup>1</sup>H-NMR (400 MHz, CDCl<sub>3</sub>): δ 4.73 (d, *J* = 5.5 Hz, 2H), 5.00 (brs, 1H), 6.63 (d, *J* = 8.9 Hz, 1H), 7.22 (ddd, *J* = 8.0, 6.9, 1.1 Hz, 1H), 7.26-7.43 (m, 5H), 7.54 (ddd, *J* = 8.5, 6.9, 1.6 Hz, 1H) 7.59 (dd, *J* = 8.0, 1.6 Hz, 1H), 7.71 (d, *J* = 8.5 Hz, 1H), 7.82 (d, *J* = 8.9 Hz, 1H); <sup>13</sup>C-NMR (100 MHz, CDCl<sub>3</sub>) δ 45.9, 111.3, 122.2, 123.6, 126.2, 127.3, 127.4, 127.8, 128.6, 129.6, 137.4, 139.3, 148.0, 156.7; MS (FAB): *m/z* 235 [M+H]<sup>+</sup>.

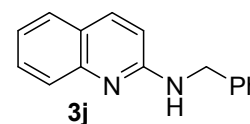

### ***N*-Benzylnicotinamide **3k****<sup>5</sup>

Following the general procedure II, **3k** was obtained as a white solid. Yield 140.1 mg (66%); mp 70–72 °C; IR (KBr) (cm<sup>-1</sup>) 3286, 3030, 1634 ; <sup>1</sup>H-NMR (400 MHz, Methanol-*d*<sub>4</sub>): δ 4.59 (s, 2H), 7.24 – 7.38 (m, 5H), 7.55 (ddd, *J* = 0.7, 4.8, 8.0 Hz, 1H), 8.27 (ddd, *J* = 3.9, 7.8, 8.0 Hz, 1H), 8.68 (dd, *J* = 1.6, 4.9 Hz, 1H), 9.00 (d, *J* = 1.6 Hz, 1H); <sup>13</sup>C-NMR (100 MHz, Methanol-*d*<sub>4</sub>) δ 44.6, 125.2, 128.3, 128.7, 129.6, 132.0, 137.1, 139.8, 149.2, 152.7, 167.7; MS (FAB): *m/z* 213 [M+H]<sup>+</sup>.

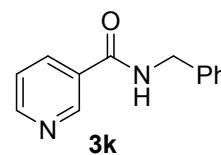

### ***N*-(4-Methoxybenzyl)-5-(trifluoromethyl)pyridin-2-amine **3l****<sup>5</sup>

Following the general procedure I, **3l** was obtained as a white solid. Yield 184 mg (65%); mp 173–175 °C; IR (KBr) (cm<sup>-1</sup>) 3229, 2910, 1620, 1579 ; <sup>1</sup>H-NMR (400 MHz, CDCl<sub>3</sub>): δ 3.81 (s, 3H), 4.48 (d, *J* = 5.7 Hz, 2H), 5.19 (s, 1H), 6.39 (d, *J* = 8.7 Hz, 3H), 6.89 (d, *J* = 8.7 Hz, 2H), 7.27 (d, *J* = 8.7 Hz, 2H), 7.57 (dd, *J* = 2.3, 8.8 Hz, 1H), 8.34 (s, 1H); <sup>13</sup>C-NMR (100 MHz, CDCl<sub>3</sub>) δ 45.6, 55.3, 106.0, 114.1, 115.7 (q, *J*<sub>CF</sub> = 32.6 Hz), 124.6 (q, *J*<sub>CF</sub> = 270.3 Hz), 128.8, 130.1, 134.5 (q, *J*<sub>CF</sub> = 2.9 Hz), 146.1 (q, *J*<sub>CF</sub> = 3.8 Hz), 159.1, 160.1; MS (FAB): *m/z* 283 [M+H]<sup>+</sup>.

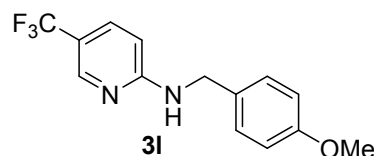

### **Methyl-6-(4-methoxybenzylamino)nicotinate **3m****

Following the general procedure I, **3m** was obtained as a white solid. Yield 225 mg (83%); mp 137–139 °C; IR (KBr) (cm<sup>-1</sup>) 3227, 2854, 1714, 1615 ; <sup>1</sup>H-NMR (400 MHz, CDCl<sub>3</sub>): δ 3.80 (s, 3H), 3.87 (s, 3H), 4.50 (d, *J* = 5.5 Hz, 2H), 5.26 (s, 1H), 6.36 (dd, *J* = 8.8, 0.7 Hz, 3H), 6.88 (d, *J* = 8.7 Hz, 2H), 7.27 (d, *J* = 8.7 Hz, 3H), 7.98 (dd, *J* = 8.7, 2.3 Hz, 1H), 8.77 (d, *J* = 1.8 Hz, 1H); <sup>13</sup>C-NMR (100 MHz, CDCl<sub>3</sub>) δ 45.6, 51.6, 56.3, 105.7, 114.1, 115.4, 128.8, 130.1, 138.6, 151.5, 159.1, 160.7, 166.4; MS (FAB): *m/z* 273 [M+H]<sup>+</sup>, HRMS (FAB): *m/z* [M+H]<sup>+</sup> calcd for C<sub>15</sub>H<sub>17</sub>N<sub>2</sub>O<sub>3</sub> 273.1239; found 273.1239.

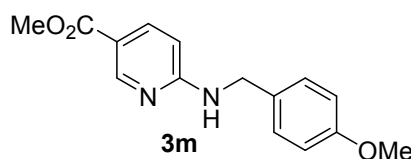

### ***N*-(4-Methoxybenzyl)pyridin-2-amine **3n****<sup>1</sup>

Following the general procedure I, **3n** was obtained as a white solid. Yield 151 mg (70%); mp 126–128 °C; IR (KBr) (cm<sup>-1</sup>) 3234, 2951, 2835, 1603, 1573; <sup>1</sup>H-NMR (400 MHz, CDCl<sub>3</sub>): δ 3.80 (s, 3H), 4.43 (d, *J* = 5.7 Hz, 2H), 4.79 (s, 1H), 6.37 (d, *J* = 8.2 Hz, 1H), 6.59 (ddd, *J* = 7.1, 5.0, 0.9 Hz, 1H), 6.88 (d, *J* = 8.7 Hz, 2H), 7.29 (d, *J* = 8.7 Hz, 3H), 7.40 (ddd, *J* = 8.6, 7.7, 2.1 Hz, 1H), 8.11 (s, 1H); <sup>13</sup>C-NMR (100 MHz, CDCl<sub>3</sub>) 45.9, 55.4, 106.9, 113.2, 114.1, 128.8, 131.2, 137.5, 148.3, 158.7, 158.9 ; MS (FAB): *m/z* 215 [M+H]<sup>+</sup>.

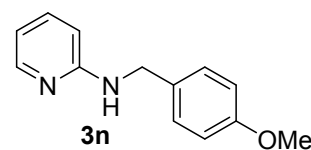

### *N*-(4-Methoxybenzyl)-5-methylpyridin-2-amine **3o** <sup>6</sup>

Following the general procedure I, **3o** was obtained as a white solid.

Yield 191 mg (84%); mp 144–146 °C; IR (KBr) (cm<sup>-1</sup>) 3235, 3007,

1614, 1534 ; <sup>1</sup>H-NMR (400 MHz, CDCl<sub>3</sub>): δ 2.17 (s, 3H), 3.80 (s,

3H), 4.40 (d, *J* = 5.7 Hz, 2H), 4.66 (s, 1H), 6.31 (d, *J* = 8.5 Hz, 1H), 6.87 (d, *J* = 8.7 Hz, 2H), 7.24 (dd, *J*

= 8.5, 2.3 Hz, 1H), 7.28 (d, *J* = 8.7 Hz, 2H), 7.93 (dd, *J* = 1.6, 0.7 Hz, 1H); <sup>13</sup>C-NMR (100 MHz, CDCl<sub>3</sub>)

δ 17.4, 46.0, 56.3, 106.4, 114.0, 121.8, 128.6, 131.4, 138.5, 147.7, 156.9, 158.8; MS (FAB): *m/z* 229

[M+H]<sup>+</sup>.

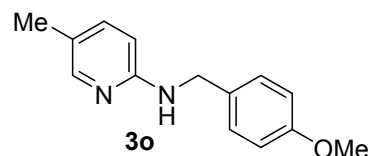

### 6-(4-Methoxybenzylamino)nicotinamide **3p** <sup>8</sup>

Following the general procedure I (3 mmol of 4-methoxybenzyl

alcohol was used), **3p** was obtained as a white solid. Yield 179

mg (70%); mp 214–216 °C; IR (KBr) (cm<sup>-1</sup>) 3481, 3413, 3192, 1668, 1651, 1606 ; <sup>1</sup>H-NMR (400 MHz,

Methanol-*d*<sub>4</sub>): δ 3.77 (s, 3H), 4.48 (s, 2H), 6.52 (d, *J* = 8.9, 1H), 6.87 (d, *J* = 8.7 Hz, 2H), 7.26 (d, *J* = 8.5,

2H), 7.86 (dd, *J* = 2.3, 8.9 Hz, 1H), 8.53 (d, *J* = 2.5 Hz, 1H); <sup>13</sup>C-NMR (100 MHz, Methanol-*d*<sub>4</sub>) δ 45.6,

55.7, 108.7, 114.9, 118.6, 129.7, 132.4, 137.7, 149.8, 160.4, 162.0, 171.1; MS (FAB): *m/z* 258 [M+H]<sup>+</sup>.

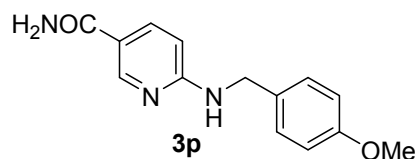

### *N*-(4-Methylbenzyl)-5-(trifluoromethyl)pyridin-2-amine **3q** <sup>9</sup>

Following the general procedure I, **3q** was obtained as a white solid.

Yield 245 mg (92%); mp 190–193 °C; IR (KBr) (cm<sup>-1</sup>) 3236, 3050,

1620 ; <sup>1</sup>H-NMR (400 MHz, CDCl<sub>3</sub>): δ 2.35 (s, 3H), 4.50 (d, *J* = 5.7 Hz,

2H), 5.25 (s, 1H), 6.39 (d, *J* = 8.7 Hz, 1H), 7.16 (d, *J* = 8.0 Hz, 2H), 7.22 (d, *J* = 8.2 Hz, 1H), 7.57 (dd, *J*

= 8.9, 2.5 Hz, 1H) 8.33 (s, 1H); <sup>13</sup>C-NMR (100 MHz, CDCl<sub>3</sub>) δ 21.1, 45.9, 106.0, 115.7 (q, *J*<sub>CF</sub> = 32.6

Hz), 124.6 (q, *J*<sub>CF</sub> = 270.3 Hz), 127.4, 129.5, 134.5 (q, *J*<sub>CF</sub> = 2.9 Hz), 135.1, 137.3, 146.1 (q, *J*<sub>CF</sub> = 4.8 Hz),

160.2; MS (FAB): *m/z* 267 [M+H]<sup>+</sup>.

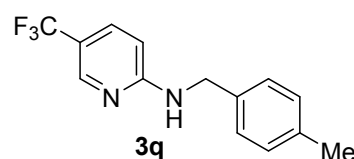

### *N*-(3-Methylbenzyl)-5-(trifluoromethyl)pyridin-2-amine **3r** <sup>1</sup>

Following the general procedure I, **3r** was obtained as a white solid.

Yield 247 mg (93%); mp 113–115 °C; IR (KBr) (cm<sup>-1</sup>) 3244, 2855,

1621, 1573; <sup>1</sup>H-NMR (400 MHz, CDCl<sub>3</sub>): δ 2.35 (s, 3H), 4.51 (d, *J* = 5.7 Hz, 2H), 5.26 (s, 1H), 6.40 (d, *J*

= 8.7 Hz, 1H), 7.10–7.16 (m, 3H), 7.23 (d, *J* = 7.6 Hz, 1H), 7.57 (dd, *J* = 8.8, 2.5 Hz, 1H) 8.34 (s, 1H);

<sup>13</sup>C-NMR (100 MHz, CDCl<sub>3</sub>) δ 21.4, 46.1, 106.0, 115.7 (q, *J*<sub>CF</sub> = 33.6 Hz), 124.4, 124.6 (q, *J*<sub>CF</sub> = 270.3),

128.1, 128.3, 128.7, 134.5 (q, *J*<sub>CF</sub> = 2.9 Hz), 138.1, 138.5, 146.1 (q, *J*<sub>CF</sub> = 3.8 Hz), 160.2; MS (FAB): *m/z*

267 [M+H]<sup>+</sup>

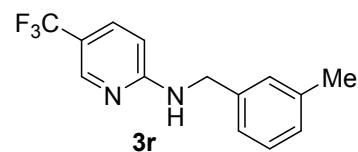

### ***N*-(2-Methoxybenzyl)-5-(trifluoromethyl)pyridin-2-amine 3s**

Following the general procedure I, **3s** was obtained as a white solid. Yield

238 mg (84%); mp 116–118 °C; IR (KBr) (cm<sup>-1</sup>) 3242, 2941, 1617; <sup>1</sup>H-

NMR (400 MHz, CDCl<sub>3</sub>): δ 3.87 (s, 3H), 4.54 (d, *J* = 6.0 Hz, 2H), 5.38 (s,

1H), 6.41 (d, *J* = 8.9 Hz, 1H), 6.89–6.94 (m, 2H), 7.28 (d, *J* = 7.6 Hz, 2H), 7.55 (dd, *J* = 8.7, 2.5 Hz, 1H),

8.33 (s, 1H); <sup>13</sup>C-NMR (100 MHz, CDCl<sub>3</sub>) δ 41.6, 56.3, 106.0, 110.3, 115.3 (q, *J*<sub>CF</sub> = 32.6 Hz), 120.5,

124.6 (q, *J*<sub>CF</sub> = 270.3 Hz), 126.1, 128.8, 128.9, 134.3 (q, *J*<sub>CF</sub> = 3.8 Hz), 146.1 (q, *J*<sub>CF</sub> = 4.8 Hz), 157.5,

160.4; MS (FAB): *m/z* 283 [M+H]<sup>+</sup>, HRMS (FAB): *m/z* [M+H]<sup>+</sup> calcd for C<sub>14</sub>H<sub>14</sub>F<sub>3</sub>N<sub>2</sub>O 283.1058; found

283.1057.

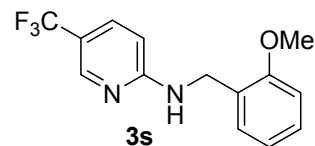

### ***N*-(4-Fluorobenzyl)-5-(trifluoromethyl)pyridin-2-amine 3t**

Following the general procedure II, **3t** was obtained as a white solid. Yield

228 mg (84%); mp 119–120 °C; IR (KBr) (cm<sup>-1</sup>): 3229, 1614, 1511; <sup>1</sup>H-

NMR (400 MHz, CDCl<sub>3</sub>): δ 4.54 (d, *J* = 5.7 Hz, 2H), 5.28 (brs, 1H), 6.39 (d, *J* = 8.7 Hz, 1H), 7.03 (tdd, *J*

= 8.7, 3.0, 2.1 Hz, 2H), 7.27–7.34 (m, 2H), 7.58 (dd, *J* = 8.8, 2.3 Hz, 1H), 8.33–8.34 (m, 1H); <sup>13</sup>C-NMR

(100 MHz, CDCl<sub>3</sub>): δ 45.3, 106.3, 115.6 (d, *J*<sub>CF</sub> = 22.0 Hz), 116.0 (q, *J*<sub>CF</sub> = 32.6 Hz), 124.5 (q, *J*<sub>CF</sub> =

270.3 Hz), 129.0 (d, *J*<sub>CF</sub> = 7.7 Hz), 134.0 (d, *J*<sub>CF</sub> = 3.8 Hz), 134.5 (q, *J*<sub>CF</sub> = 2.9 Hz), 146.1 (q, *J*<sub>CF</sub> = 4.8

Hz), 160.0, 162.2 (d, *J*<sub>CF</sub> = 245.4 Hz); HRMS (FAB): *m/z* [M+H]<sup>+</sup> calcd for C<sub>13</sub>H<sub>11</sub>F<sub>4</sub>N<sub>2</sub> 271.0858; found

271.0858.

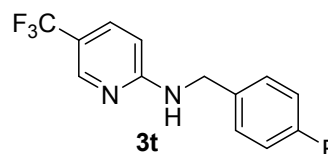

### ***N*-(3-Fluorobenzyl)-5-(trifluoromethyl)pyridin-2-amine 3u**

Following the general procedure II, **3u** was obtained as a white solid.

Yield 153 mg (56%); mp 103–104 °C; IR (KBr) (cm<sup>-1</sup>): 3235, 1618,

1329; <sup>1</sup>H-NMR (400 MHz, CDCl<sub>3</sub>): δ 4.58 (d, *J* = 6.0 Hz, 2H), 5.32 (brs, 1H), 6.40 (d, *J* = 8.9 Hz, 1H),

6.97 (dddd, *J* = 8.7, 8.2, 2.5, 0.5 Hz, 1H), 7.05 (ddd, *J* = 9.6, 2.3, 1.6 Hz, 1H), 7.12 (dd, *J* = 7.6, 0.7 Hz,

1H), 7.31 (ddd, *J* = 8.0, 8.0, 6.0 Hz, 1H), 7.58 (dd, *J* = 8.8, 2.5 Hz, 1H), 8.34–8.35 (m, 1H); <sup>13</sup>C-NMR

(100 MHz, CDCl<sub>3</sub>): δ 45.4, 106.3, 114.2 (d, *J*<sub>CF</sub> = 22.0 Hz), 114.4 (d, *J*<sub>CF</sub> = 21.1 Hz), 116.1 (q, *J*<sub>CF</sub> = 33.6

Hz), 122.8 (d, *J*<sub>CF</sub> = 2.9 Hz), 124.5 (d, *J*<sub>CF</sub> = 270.3 Hz), 130.3 (d, *J*<sub>CF</sub> = 8.6 Hz), 134.5 (q, *J*<sub>CF</sub> = 2.9 Hz),

141.1 (d, *J*<sub>CF</sub> = 6.7 Hz), 146.1 (q, *J*<sub>CF</sub> = 3.8 Hz), 160.0, 163.1 (d, *J*<sub>CF</sub> = 246.3 Hz); HRMS (FAB): *m/z*

[M+H]<sup>+</sup> calcd for C<sub>13</sub>H<sub>11</sub>F<sub>4</sub>N<sub>2</sub> 271.0858; found: 271.0857.

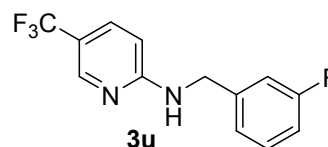

### **5-Fluoro-*N*-(4-fluorobenzyl)pyridin-2-amine 3v**<sup>10</sup>

Following the general procedure II, **3v** was obtained as a white solid.

Yield 195 mg (88%); mp 90–91 °C; IR (KBr) (cm<sup>-1</sup>) 3246, 1535, 1233;

<sup>1</sup>H-NMR (400 MHz, CDCl<sub>3</sub>): δ 4.45 (d, *J* = 6.0 Hz, 2H), 4.77 (brs, 1H),

6.32 (dd, *J* = 9.2, 3.4 Hz, 1H), 7.02 (tdd, *J* = 8.7, 3.0, 2.1 Hz, 2H), 7.19 (ddd, *J* = 8.9, 8.0, 3.0 Hz, 1H),

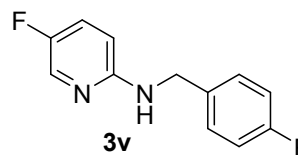

7.31 (dd,  $J = 8.4, 5.3$  Hz, 2H), 7.97 (d,  $J = 3.0$  Hz, 1H);  $^{13}\text{C}$ -NMR (100 MHz,  $\text{CDCl}_3$ ):  $\delta$  46.1, 107.2 (d,  $J_{\text{CF}} = 3.8$  Hz), 115.5 (d,  $J_{\text{CF}} = 21.1$  Hz), 125.3 (d,  $J_{\text{CF}} = 20.1$  Hz), 129.0 (d,  $J_{\text{CF}} = 7.7$  Hz), 134.8 (d,  $J_{\text{CF}} = 24.9$  Hz), 134.8 (d,  $J_{\text{CF}} = 3.8$  Hz), 153.6 (d,  $J_{\text{CF}} = 241.5$  Hz), 155.1, 162.1 (d,  $J_{\text{CF}} = 245.4$  Hz); HRMS (FAB):  $m/z$   $[\text{M}+\text{H}]^+$  calcd for  $\text{C}_{12}\text{H}_{11}\text{F}_2\text{N}_2$  221.089; found 221.089.

## References

1. H. Hikawa, H. Imamura, S. Kikkawa, I. Azumaya, *Green Chem.* **2018**, *20*, 3044.
2. A. V. Gulevskaya, B. U. W. Maes, C. Meyers, W. A. Herrebout, B. J. van der Veken, *Eur. J. Org. Chem.* **2006**, 5305-5314.
3. P. J. Skinner, M. C. Cherrier, P. J. Webb, C. R. Sage, H. T. Dang, C. C. Pride, R. Chen, S. Y. Tamura, J. G. Richman, D. T. Connolly, G. Semple, *Bioorg. Med. Chem. Lett.* **2007**, *17*, 6619.
4. H. Hikawa, R. Tan, A. Tazawa, S. Kikkawa, I. Azumaya, *Eur. J. Org. Chem.* **2020**, 539.
5. J. Das, D. Banerjee, *J. Org. Chem.* **2018**, *83*, 3378-3384.
6. alsh, H. F. Sneddon, C. J. Moody, *ChemSusChem* **2013**, *6*, 1455.
7. B. E. Fink, L. Chen, P. Chen, D. S. Dodd, A. V. Gavai, S.-H. Kim, W. Vaccaro, L. H. Zhang, Y. Zhao, **2009**, WO 2009100375 20090813.
8. Y. Hoshimoto, T. Kinoshita, S. Hazra, M. Ohashi, S. Ogoshi, *J. Am. Chem. Soc.* **2018**, *140*, 7292.
9. N. Kuboyama, K. Koizumi, O. Yamashita, O. Wakabayashi, K. Tomono, T. Hattori, **1999**, JP 11246528 A 19990914.
10. Z.-W. Xi, L. Yang, D.-Y. Wang, C.-D. Pu, Y.-M. Shen, C.-D. Wu, X.-G. Peng, *J. Org. Chem.* **2018**, *83*, 11886.



**Table S1.** Effects of catalysts and solvents.

A mixture of 5-(trifluoromethyl)pyridin-2-amine **1a** (162 mg, 1 mmol), Pd(OAc)<sub>2</sub> (11 mg, 0.05 mmol), sodium diphenylphosphinobenzene-3-sulfonate (TPPMS, 36 mg, 0.1 mmol), and benzyl alcohol **2a** (515 μL, 5 mmol), in heptane (4 mL) was heated at 100 °C for 4 h in a sealed tube under air. After the reaction mixture was cooled, 1,3,5-trimethoxybenzene (168 mg, 1 mmol, internal standard) and EtOAc were added to the reaction mixture. The organic layer was concentrated in vacuo. The residue was analyzed by <sup>1</sup>H-NMR spectroscopy.

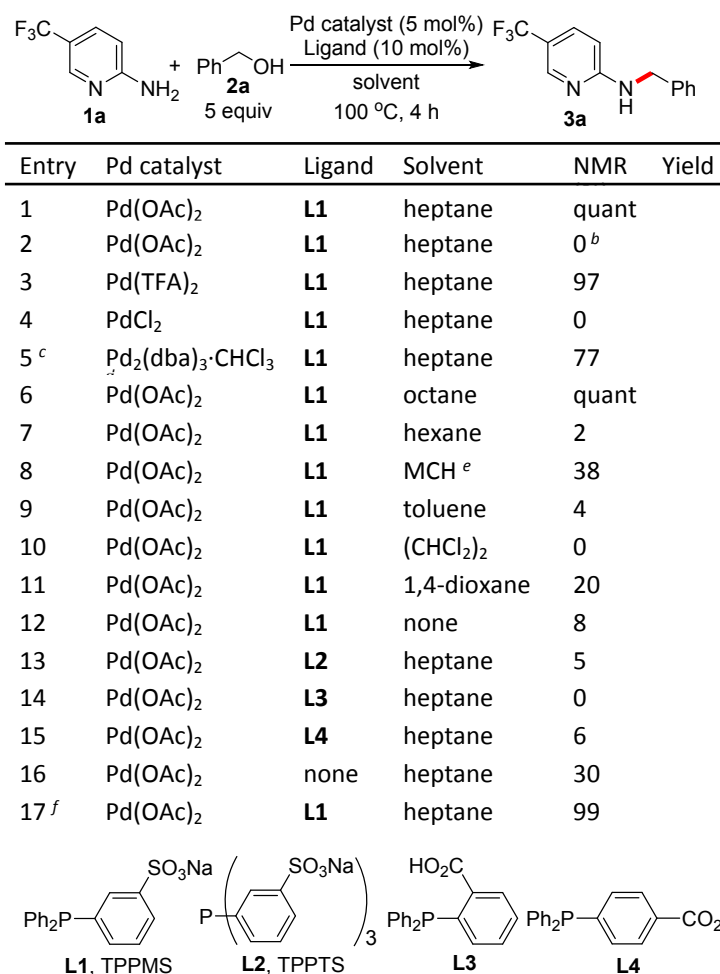

<sup>a</sup> Reaction conditions: **1a** (1 mmol), catalyst (5 mol%), TPPMS (10 mol%), **2a** (5 equiv), solvent (4 mL), 100 °C, 4 h under air. <sup>b</sup> Alcohol **2a** (3 equiv) was used. <sup>c</sup> Conducted at 120 °C for 16 h. <sup>d</sup> 2.5 mol%. <sup>e</sup> Methylcyclohexane. <sup>f</sup> Under Ar.

**Scheme S2.** Reaction time course.

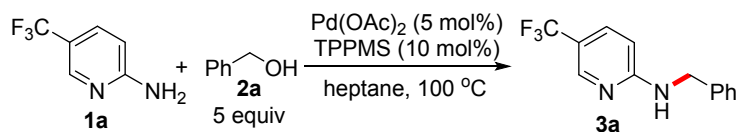

A mixture of 5-(trifluoromethyl)pyridin-2-amine **1a** (162 mg, 1 mmol), Pd(OAc)<sub>2</sub> (11 mg, 0.05 mmol), sodium diphenylphosphinobenzene-3-sulfonate (TPPMS, 36 mg, 0.1 mmol), benzyl alcohol **2a** (515  $\mu$ L, 5 mmol), and 1,3,5-trimethoxybenzene (168 mg, 1 mmol, internal standard) in heptane (4 mL) was heated at 100 °C in a sealed tube under air. Every hour, a few drops of the reaction mixture were transferred into a test tube. The sample was extracted with CDCl<sub>3</sub>, which was analyzed by <sup>1</sup>H-NMR spectroscopy.

| Time (h) | [ <b>1a</b> ] | [ <b>3a</b> ] | [ <b>4a</b> ] |
|----------|---------------|---------------|---------------|
| 0        | 0.25          | 0             | 0             |
| 1        | 0.25          | 0             | 0.015         |
| 2        | 0.24          | 0.01          | 0.035         |
| 3        | 0.17          | 0.085         | 0.103         |
| 4        | 0             | 0.25          | 0.208         |

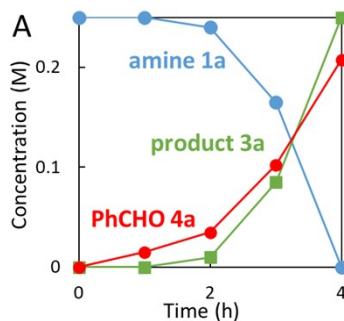

| Time (h) | [ <b>2a</b> ] | ln [ <b>2a</b> ]/[ <b>2a</b> ] <sub>0</sub> |
|----------|---------------|---------------------------------------------|
| 0        | 1.25          | 0                                           |
| 1        | 1.24          | -0.008032172                                |
| 2        | 1.22625       | -0.019182819                                |
| 3        | 0.99625       | -0.2269006                                  |
| 4        | 0.59          | -0.750776293                                |
| 5        | 0.46125       | -0.996958635                                |

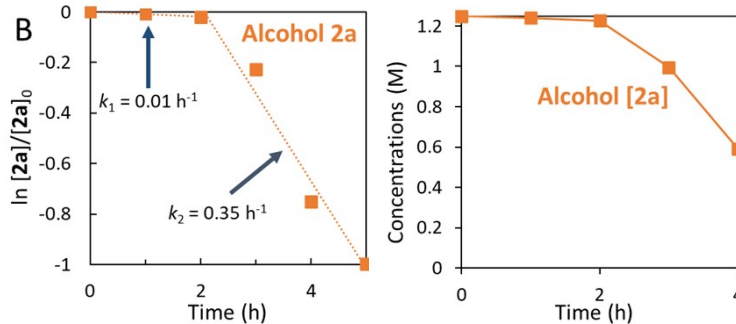

**Scheme S3.** Comparison of reaction rates in heptane with the addition of H<sub>2</sub>O (1 mmol) *versus* D<sub>2</sub>O (1 mmol).

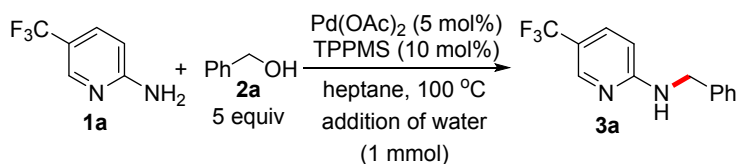

A mixture of 5-(trifluoromethyl)pyridin-2-amine **1a** (162 mg, 1 mmol), Pd(OAc)<sub>2</sub> (11 mg, 0.05 mmol), sodium diphenylphosphinobenzene-3-sulfonate (TPPMS, 36 mg, 0.1 mmol), benzyl alcohol **2a** (515  $\mu$ L, 5 mmol), 1,3,5-trimethoxybenzene (168 mg, 1 mmol, internal standard), and H<sub>2</sub>O (18 mg, 1 mmol) or D<sub>2</sub>O (20 mg, 1 mmol) in heptane (4 mL) was heated at 100 °C in a sealed tube under air. Every hour, a few drops of the reaction mixture were transferred into a test tube. The sample was extracted with CDCl<sub>3</sub>, which was analyzed by <sup>1</sup>H-NMR spectroscopy.

Addition of H<sub>2</sub>O (1 mmol)

| Time (h) | [ <b>2a</b> ] | ln [ <b>2a</b> ]/[ <b>2a</b> ] <sub>0</sub> |
|----------|---------------|---------------------------------------------|
| 0        | 1.25          | 0                                           |
| 1        | 1.0725        | -0.153151179                                |
| 2        | 0.93125       | -0.294371061                                |
| 3        | 0.7375        | -0.527632742                                |
| 4        | 0.575         | -0.776528789                                |
| 5        | 0.46125       | -0.996958635                                |

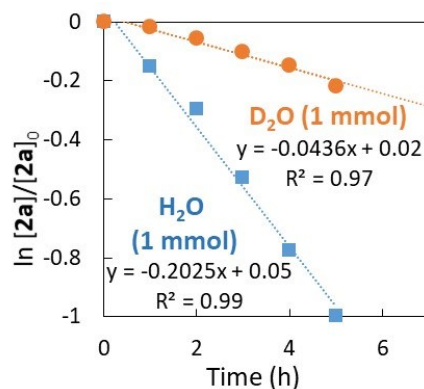

Addition of D<sub>2</sub>O (1 mmol)

| Time (h) | [ <b>2a</b> ] | ln [ <b>2a</b> ]/[ <b>2a</b> ] <sub>0</sub> |
|----------|---------------|---------------------------------------------|
| 0        | 1.25          | 0                                           |
| 1        | 1.23          | -0.016129382                                |
| 2        | 1.18125       | -0.056570351                                |
| 3        | 1.1275        | -0.103140759                                |
| 4        | 1.07875       | -0.147340588                                |
| 5        | 1.00625       | -0.216913002                                |

$$\text{KSIE } (k_{\text{H}_2\text{O}}/k_{\text{D}_2\text{O}}) = 0.2025/0.0436 = 4.6$$

**Scheme S4.** Comparison of reaction rates in H<sub>2</sub>O versus in D<sub>2</sub>O.

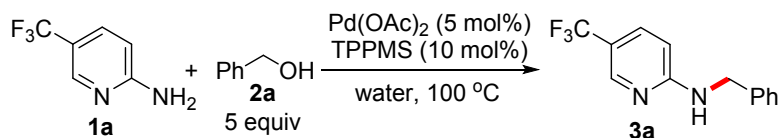

A mixture of 5-(trifluoromethyl)pyridin-2-amine **1a** (162 mg, 1 mmol), Pd(OAc)<sub>2</sub> (11 mg, 0.05 mmol), sodium diphenylphosphinobenzene-3-sulfonate (TPPMS, 36 mg, 0.1 mmol), benzyl alcohol **2a** (515 μL, 5 mmol), and 1,3,5-trimethoxybenzene (168 mg, 1 mmol, internal standard) in H<sub>2</sub>O or D<sub>2</sub>O (4 mL) was heated at 100 °C in a sealed tube under air. Every hour, a few drops of the reaction mixture were transferred into a test tube. The sample was extracted with CDCl<sub>3</sub>, which was analyzed by <sup>1</sup>H-NMR spectroscopy.

in H<sub>2</sub>O

| Time (h) | [ <b>2a</b> ] | ln [ <b>2a</b> ]/[ <b>2a</b> ] <sub>0</sub> |
|----------|---------------|---------------------------------------------|
| 0        | 1.25          | 0                                           |
| 1        | 1.175         | -0.061875404                                |
| 2        | 1.0275        | -0.196014884                                |
| 3        | 0.88125       | -0.349557476                                |
| 4        | 0.815         | -0.427710717                                |
| 5        | 0.74125       | -0.52256088                                 |
| 6        | 0.65875       | -0.64055473                                 |
| 7        | 0.56375       | -0.796287939                                |

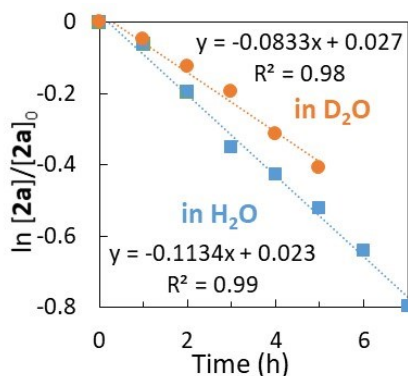

in D<sub>2</sub>O

| Time (h) | [ <b>2a</b> ] | ln [ <b>2a</b> ]/[ <b>2a</b> ] <sub>0</sub> |
|----------|---------------|---------------------------------------------|
| 0        | 1.25          | 0                                           |
| 1        | 1.19125       | -0.048140375                                |
| 2        | 1.105         | -0.123298216                                |
| 3        | 1.0275        | -0.196014884                                |
| 4        | 0.91375       | -0.313341819                                |
| 5        | 0.83          | -0.40947313                                 |

$$\text{KSIE } (k_{\text{H}_2\text{O}}/k_{\text{D}_2\text{O}}) = 0.1134/0.0833 = 1.4$$

**Scheme S5.** Crossover experiment.

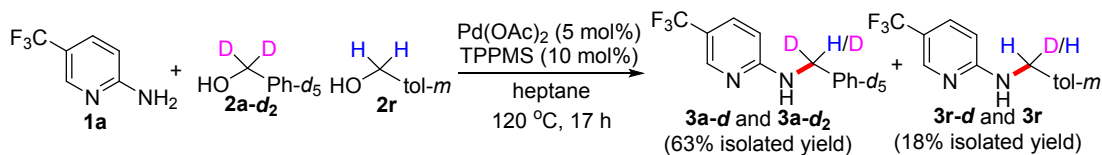

A mixture of 5-(trifluoromethyl)pyridin-2-amine **1a** (162 mg, 1 mmol),  $\text{Pd}(\text{OAc})_2$  (11 mg, 0.05 mmol), TPPMS (36 mg, 0.1 mmol), benzylalcohol- $d_7$  **2a-d<sub>2</sub>** (290 mg, 2.5 mmol), 3-methylbenzyl alcohol **2r** (305 mg, 2.5 mmol) in heptane (4 mL) was heated at 120 °C for 17 h in a sealed tube under air. After cooling, the reaction mixture was poured into water and extracted with EtOAc. The organic layer was washed with brine, dried over  $\text{MgSO}_4$  and concentrated in vacuo. The residue was purified by flash column chromatography (silica gel, hexanes/EtOAc) to give *N*-benzyl-5-(trifluoromethyl)pyridin-2-amines (**3a-d** and **3a-d<sub>2</sub>** mixture) and *N*-(3-methylbenzyl)-5-(trifluoromethyl)pyridin-2-amines (**3r** and **3r-d** mixture) in 63% and 18% yield, respectively.

| <i>N</i> -(3-Methylbenzyl)-5-(trifluoromethyl)pyridin-2-amines ( <b>3r</b> and <b>3r-d</b> mixture) |                                                                                |                         |
|-----------------------------------------------------------------------------------------------------|--------------------------------------------------------------------------------|-------------------------|
| Signal $\delta$                                                                                     | 4.5 (d, $J=5.6$ Hz, 2H): methylene                                             | 6.4 (d, $J=8.8$ Hz, 1H) |
| Integral value                                                                                      | 1.65                                                                           | 1.00                    |
|                                                                                                     | $[\mathbf{3r-d}] = x$ , $[\mathbf{3r}] = 1-x$ , $x + 2(1-x) = 1.65$ , $x=0.35$ |                         |

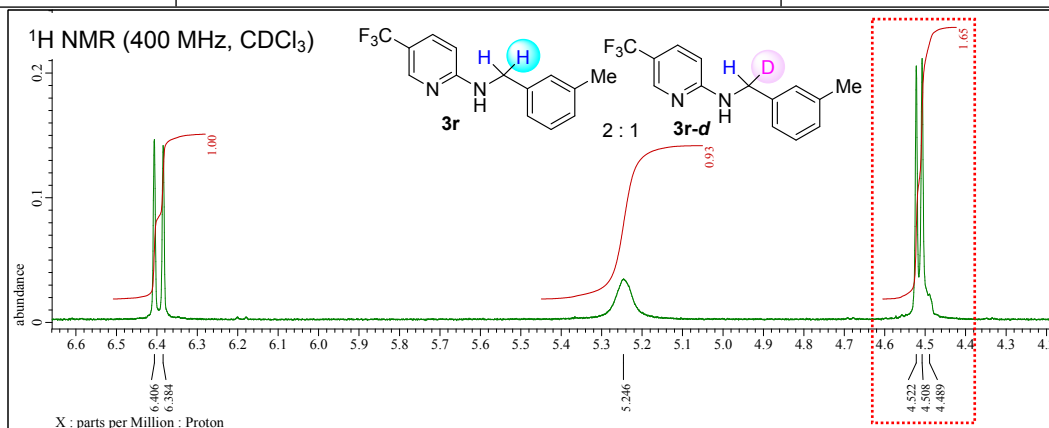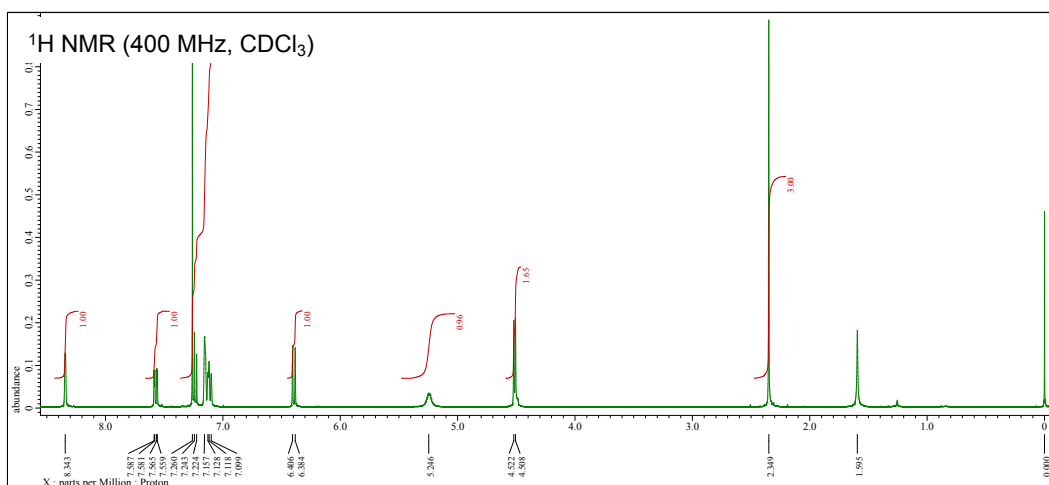

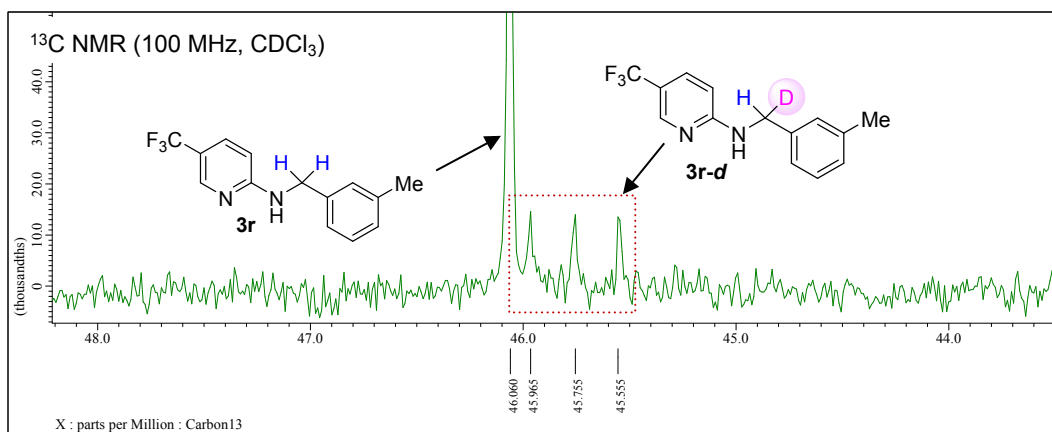

| N-Benzyl-5-(trifluoromethyl)pyridin-2-amines ( <b>3a-d</b> and <b>3a-d<sub>2</sub></b> mixture) |                                                                       |                         |
|-------------------------------------------------------------------------------------------------|-----------------------------------------------------------------------|-------------------------|
| Signal $\delta$                                                                                 | 4.5-4.6 (m, 1H): methylene                                            | 6.4 (d, $J=8.4$ Hz, 1H) |
| Integral value                                                                                  | 0.81                                                                  | 1.00                    |
|                                                                                                 | [ <b>3a-d</b> ] = 0.81, [ <b>3a-d<sub>2</sub></b> ] = 1 - 0.81 = 0.19 |                         |

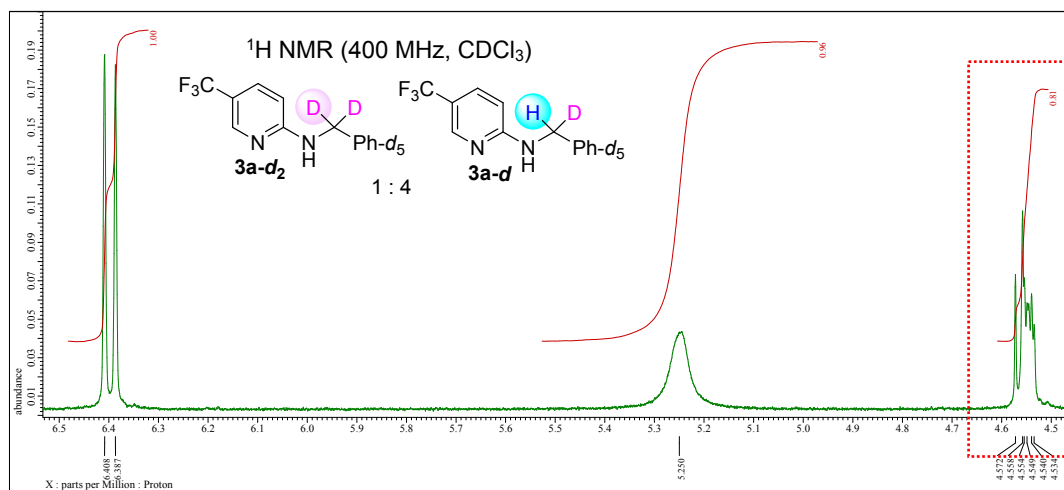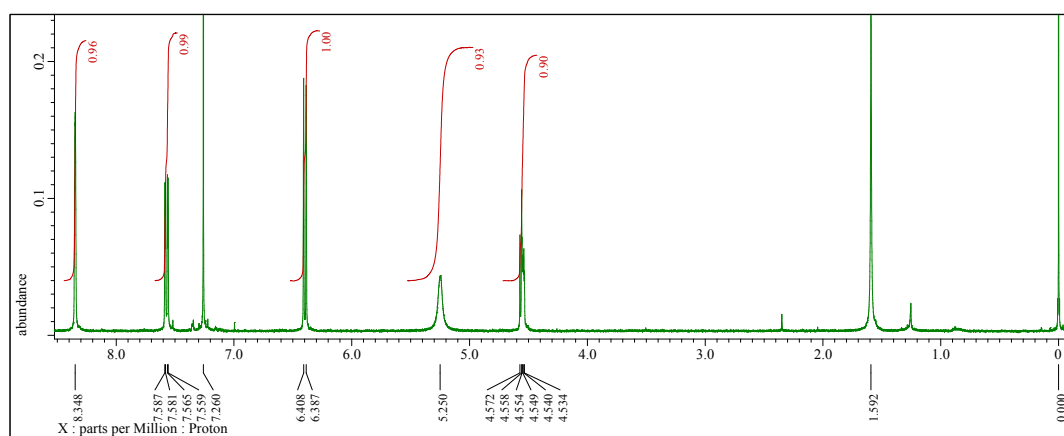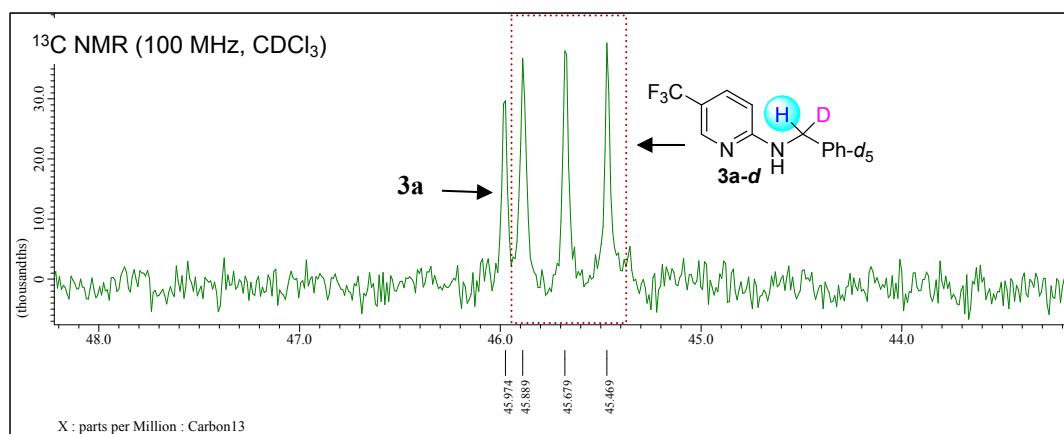

**Scheme S6.** Kinetic isotope effect.

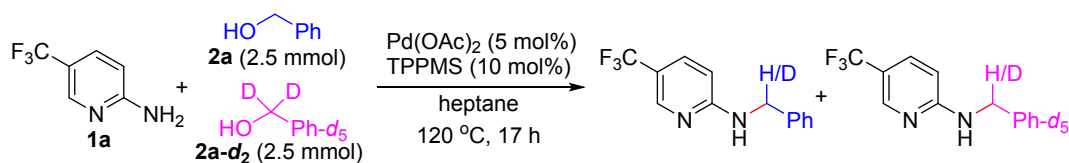

A mixture of 5-(trifluoromethyl)pyridin-2-amine **1a** (162 mg, 1 mmol), Pd(OAc)<sub>2</sub> (11 mg, 5 mol%), TPPMS (36 mg, 10 mol%), benzyl alcohol **2a** (271 mg, 2.5 mmol), and benzyl-*d*<sub>7</sub> alcohol **2a-d<sub>2</sub>** (293 mg, 2.5 mmol) in H<sub>2</sub>O (4 mL) was heated at 120 °C for 17 h in a sealed tube under air. After cooling, the reaction mixture was poured into water and extracted with EtOAc. The organic layer was washed with brine, dried over MgSO<sub>4</sub> and concentrated in vacuo. The residue was purified by flash column chromatography (silica gel, hexane/EtOAc). The product was analyzed by <sup>1</sup>H-NMR spectroscopy.

|                                                                                          |                                  |
|------------------------------------------------------------------------------------------|----------------------------------|
| Signal δ 7.18-7.38 (Phenyl- <b>5H</b> and pyridine- <b>H</b> : total <b>6H</b> ), 3.77   | 6.64 (pyridine- <b>H</b> ), 1.00 |
| 3.77 (Ph- <b>5H</b> ), 5.00-3.77 = 1.23 (Ph- <b>5D</b> ), <b>KIE = 3.77 / 1.23 = 3.1</b> |                                  |

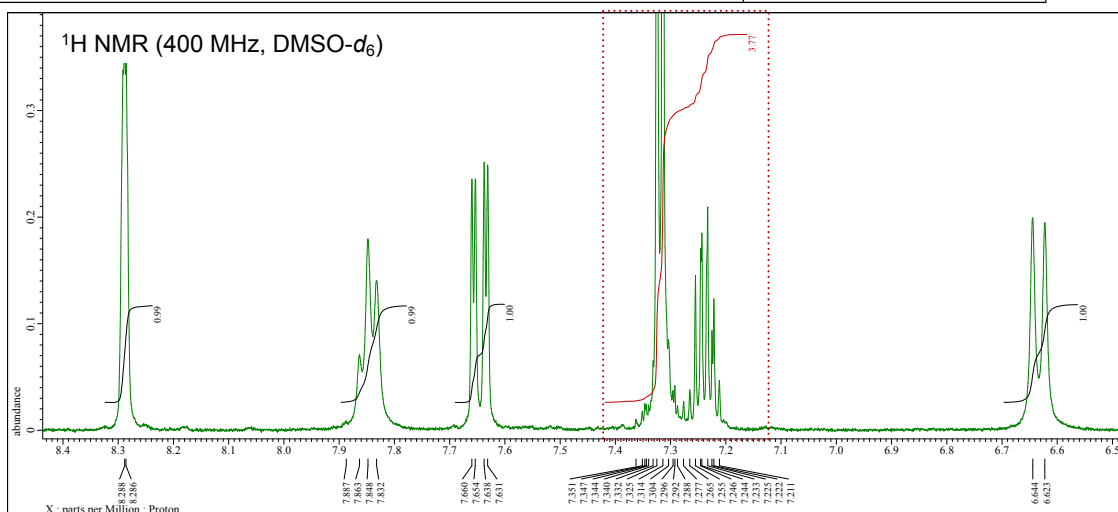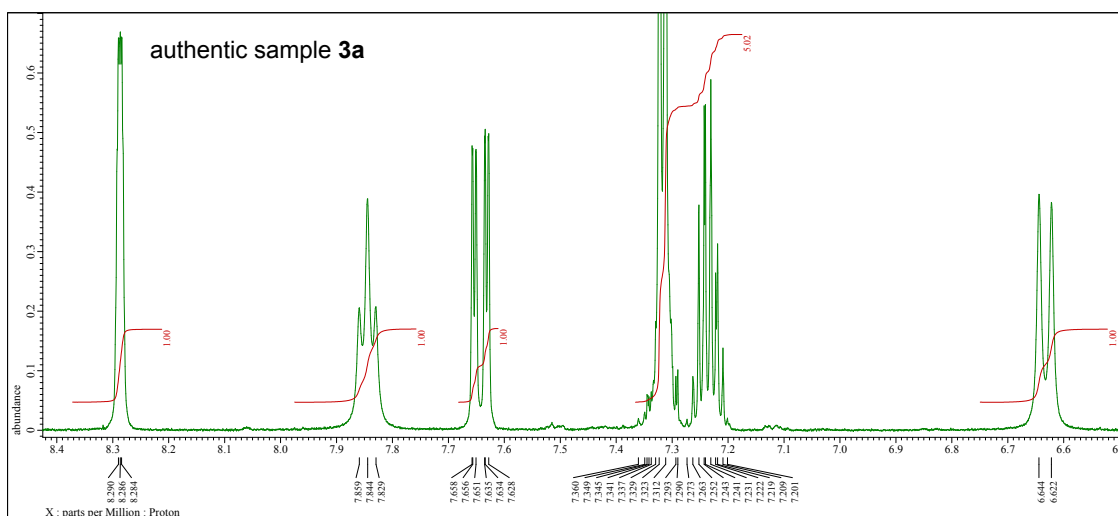



**Scheme S7.** Dehydrative benzylation of aniline.

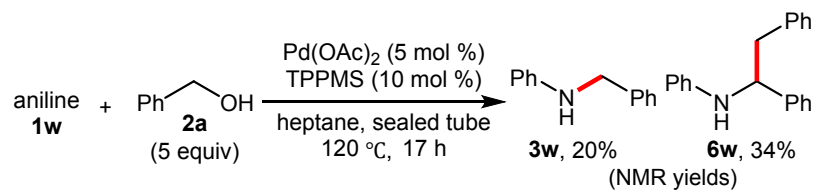

A mixture of aniline (**1w**) (93 mg, 1 mmol), Pd(OAc)<sub>2</sub> (11 mg, 0.05 mmol), sodium diphenylphosphinobenzene-3-sulfonate (TPPMS, 36 mg, 0.1 mmol), and benzyl alcohol **2a** (515  $\mu$ L, 5 mmol), in heptane (4 mL) was heated at 120  $^\circ$ C for 17 h in a sealed tube under air. After the reaction mixture was cooled, 1,3,5-trimethoxybenzene (168 mg, 1 mmol, internal standard) and EtOAc were added to the reaction mixture. The organic layer was concentrated in vacuo. The residue was analyzed by <sup>1</sup>H-NMR spectroscopy.

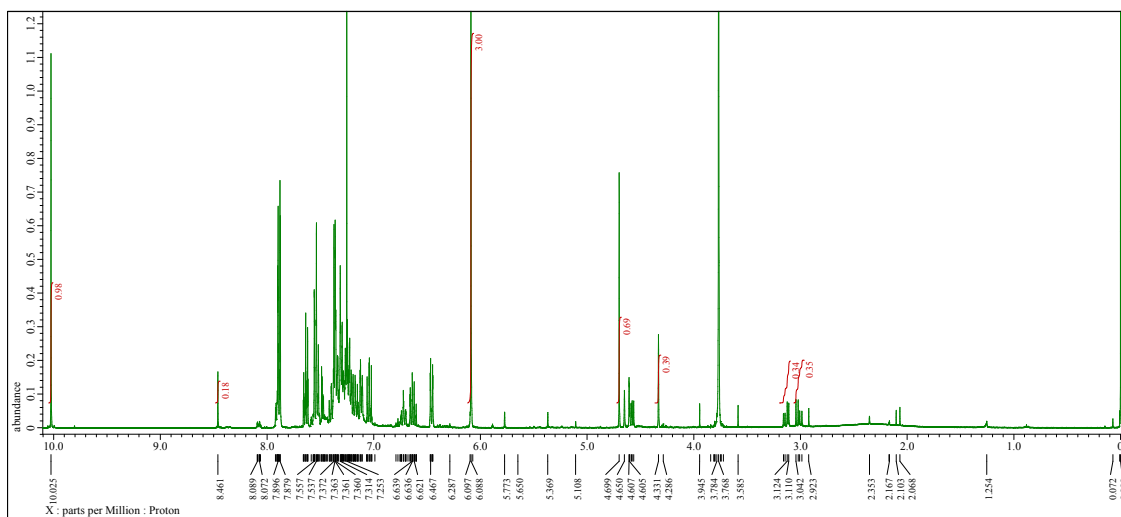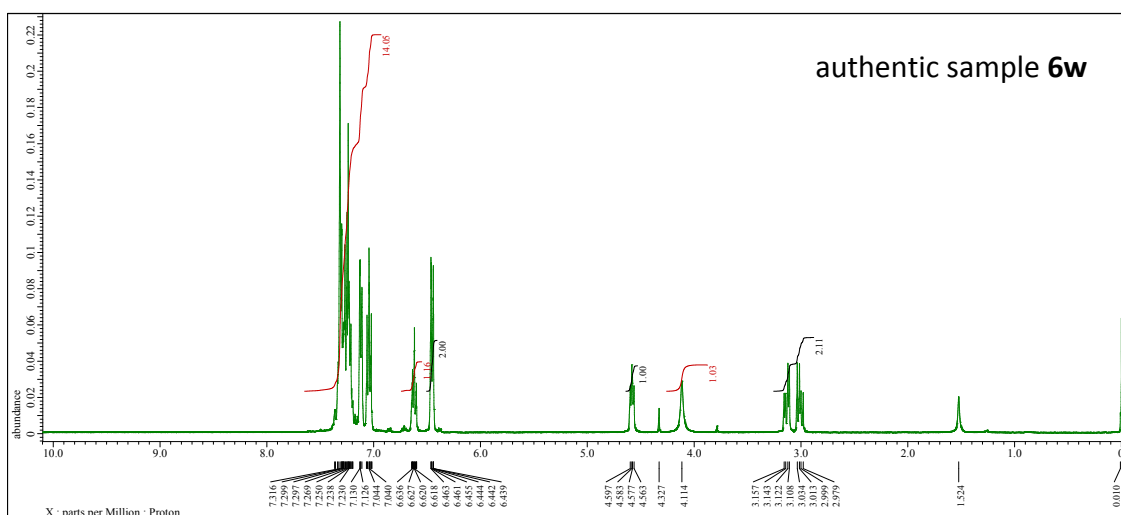

**Scheme S8.** Deuterium incorporation into the benzylic position.

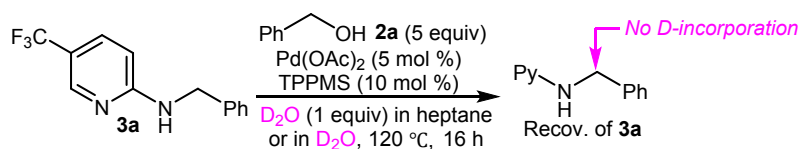

**1. Addition of  $\text{D}_2\text{O}$  (1 mmol) in heptane.**

A mixture of N-benzylated substrate (**3a**) (252 mg, 1 mmol),  $\text{Pd}(\text{OAc})_2$  (11 mg, 0.05 mmol), sodium diphenylphosphinobenzene-3-sulfonate (TPPMS, 36 mg, 0.1 mmol), and benzyl alcohol **2a** (515  $\mu\text{L}$ , 5 mmol),  $\text{D}_2\text{O}$  (20 mg, 1 mmol) in heptane (4 mL) was heated at 120 °C for 16 h in a sealed tube under air. After the reaction mixture was cooled, the organic layer was concentrated in vacuo. The residue was analyzed by  $^1\text{H}$ -NMR spectroscopy.

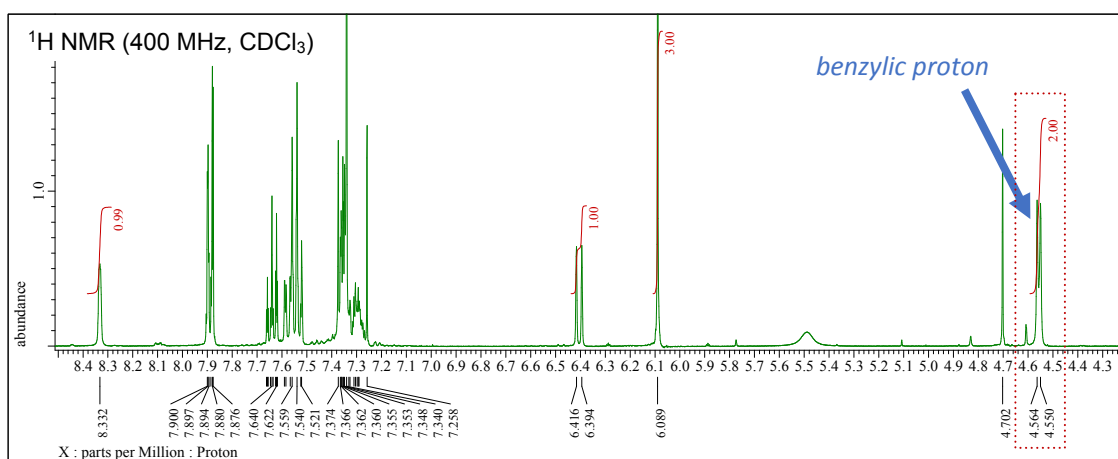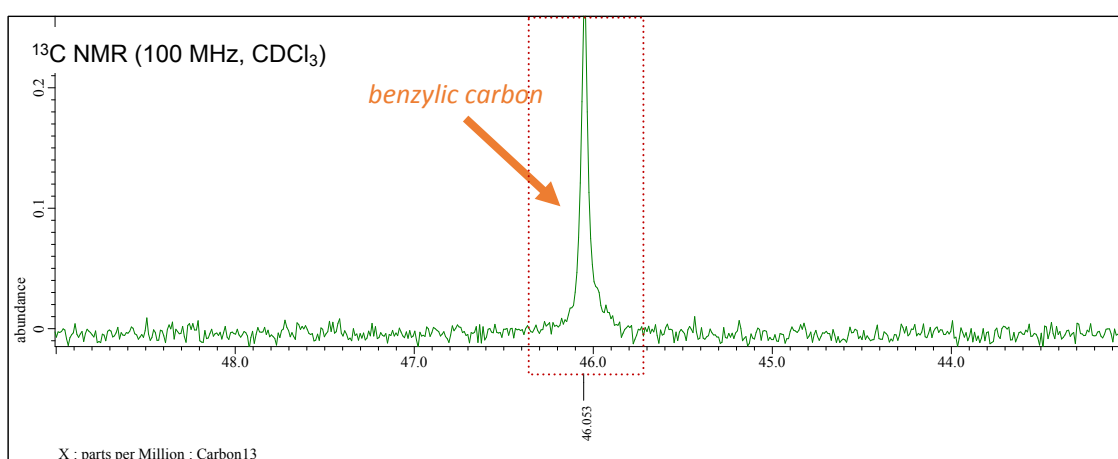

## 2. The reaction in D<sub>2</sub>O (4 mL) as a solvent.

A mixture of N-benzylated substrate (**3a**) (252 mg, 1 mmol), Pd(OAc)<sub>2</sub> (11 mg, 0.05 mmol), sodium diphenylphosphinobenzene-3-sulfonate (TPPMS, 36 mg, 0.1 mmol), and benzyl alcohol **2a** (515 μL, 5 mmol) in D<sub>2</sub>O (4 mL) was heated at 120 °C for 16 h in a sealed tube under air. After the reaction mixture was cooled, the organic layer was concentrated in vacuo. The residue was analyzed by <sup>1</sup>H-NMR spectroscopy.

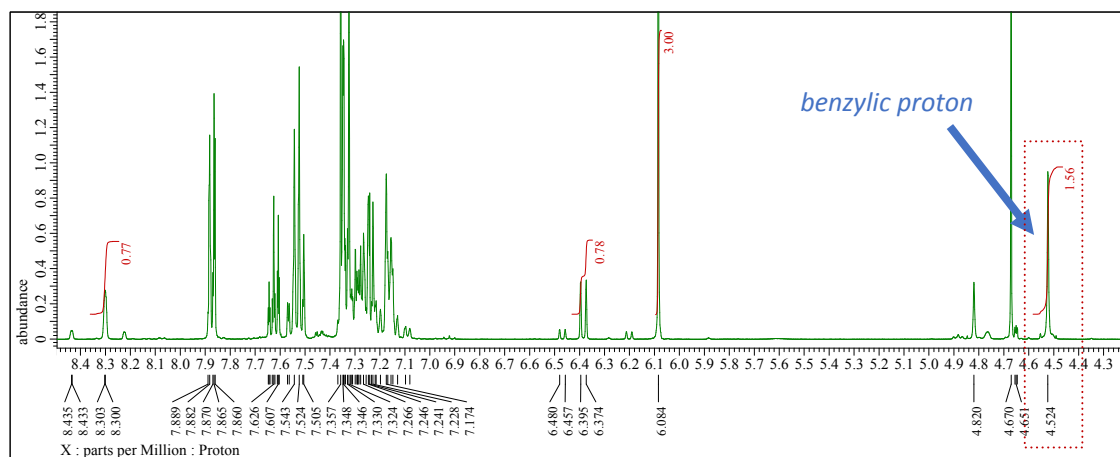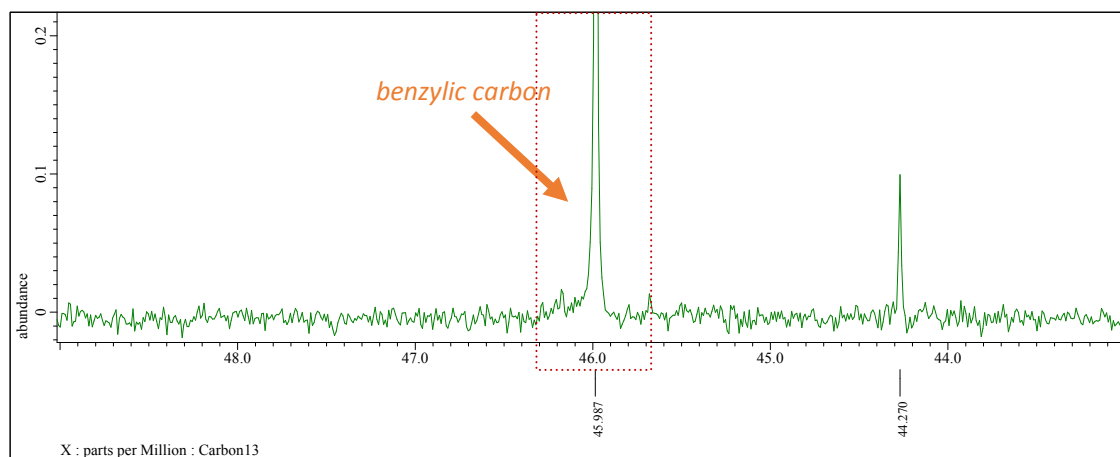

**Scheme S9.** Scale-up experiment.

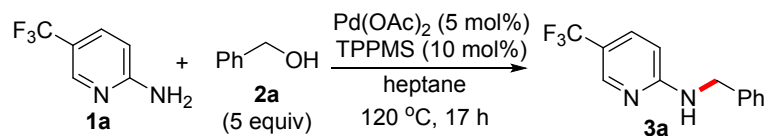

A mixture of 2-amino-5-(trifluoromethyl)pyridine (**1a**) (1.13 g, 7.0 mmol), palladium(II) acetate (78.6 mg, 0.35 mmol), sodium diphenylphosphinobenzene-3-sulfonate (TPPMS, 254.7 mg, 0.7 mmol) and benzyl alcohol (**2a**) (5 mmol) in heptane (28 mL) was heated at 120 °C for 17 h in a sealed tube under air. After cooling, the reaction mixture was poured into water and extracted with EtOAc. The organic layer was washed with brine, dried over  $\text{MgSO}_4$  and concentrated in vacuo. The residue was triturated with hexane to give desired product **3a** (1.56 g, 6.2 mmol, 88%).

**N-Benzyl-5-(trifluoromethyl)pyridin-2-amine 3a**

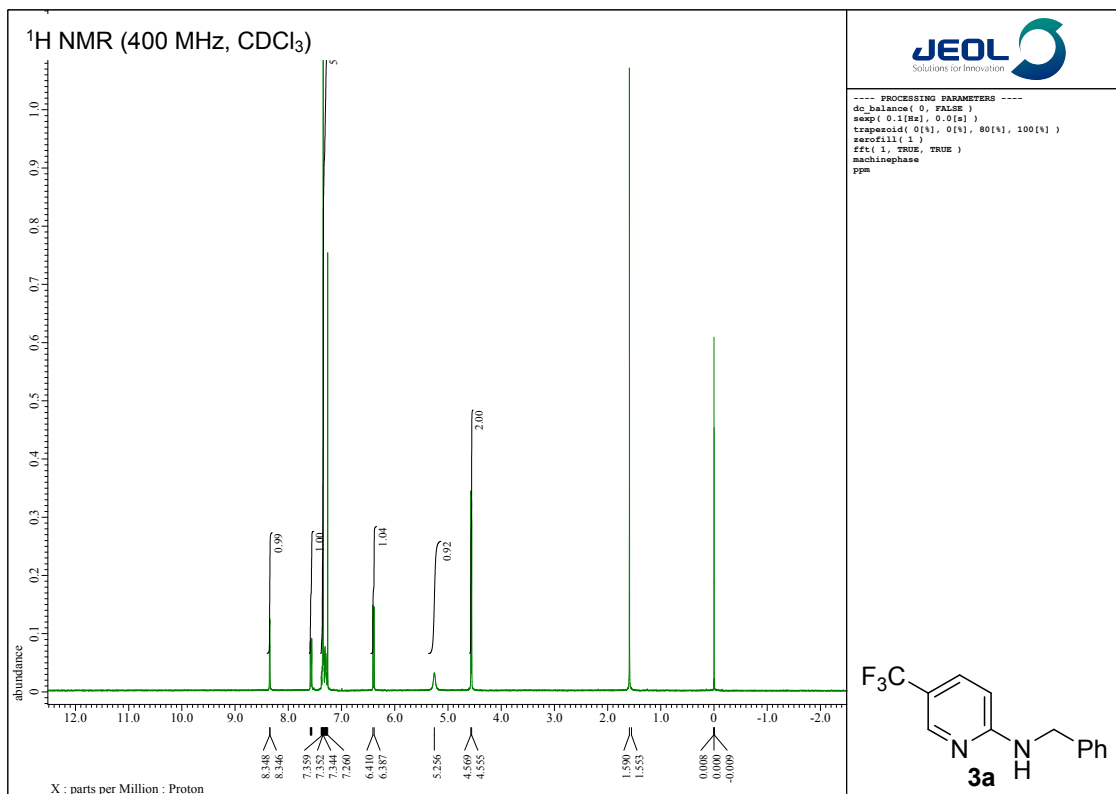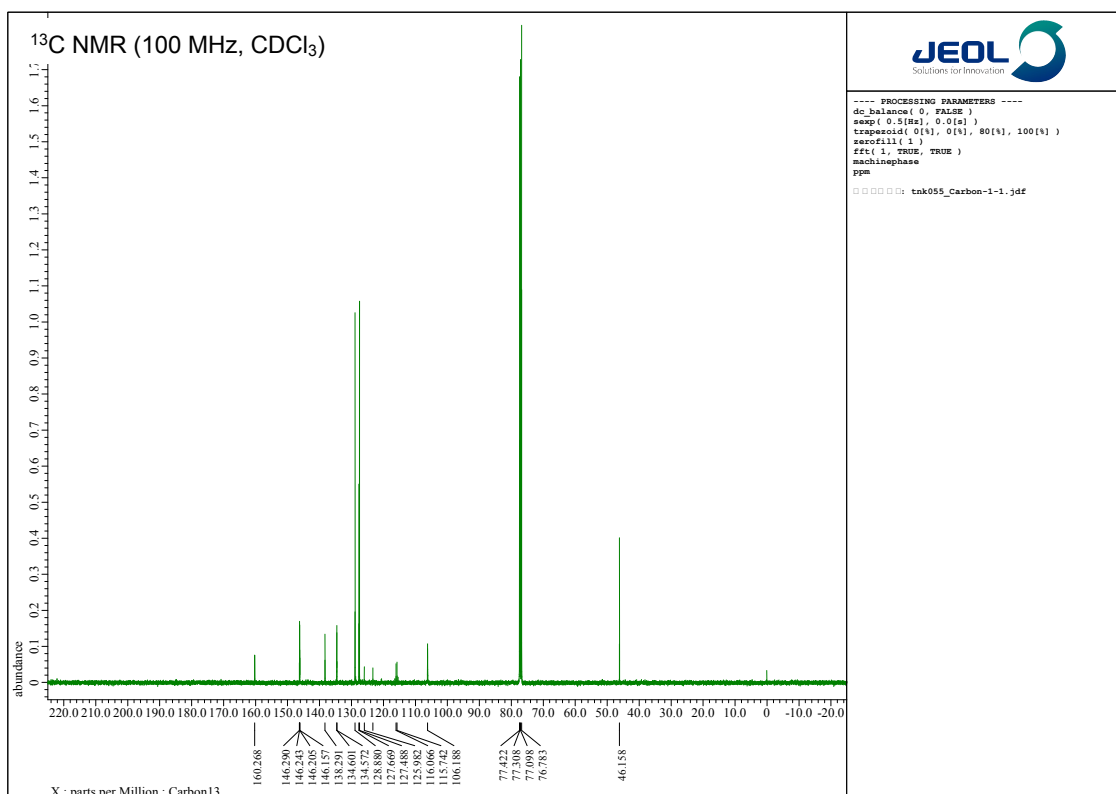

**N-Benzyl-5-fluoropyridin-2-amine 3b**

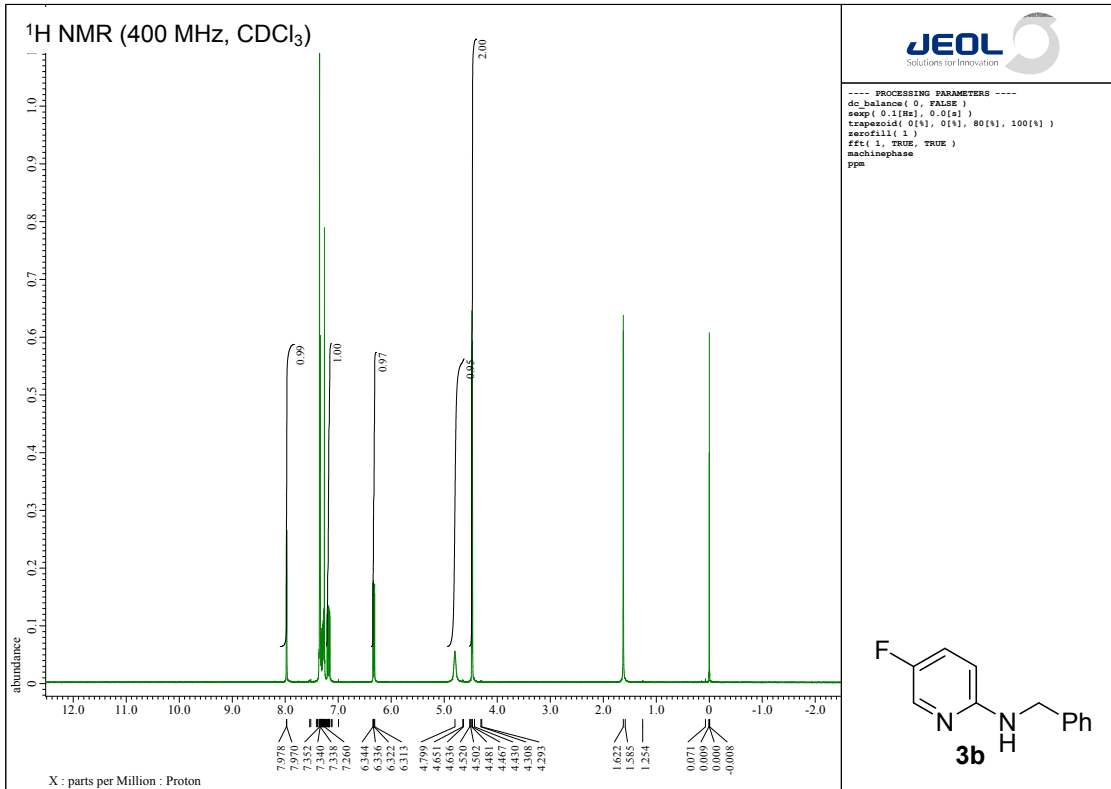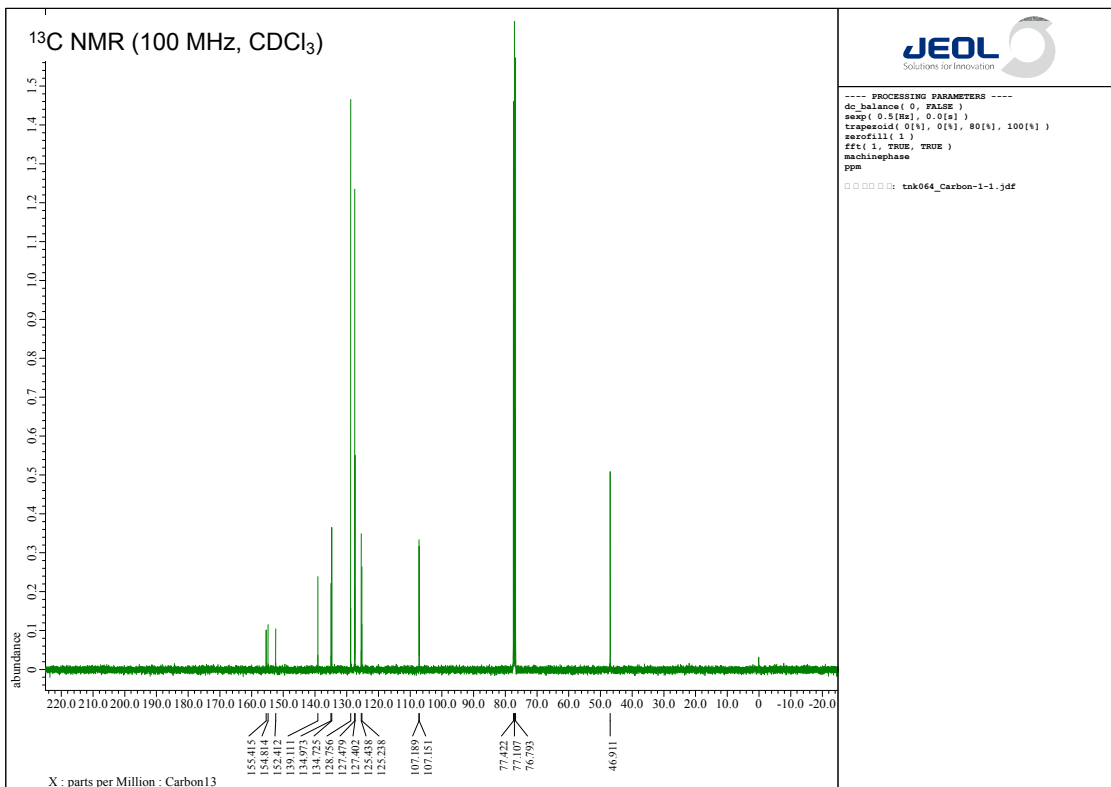

Methyl-6-(benzylamino)nicotinate 3c

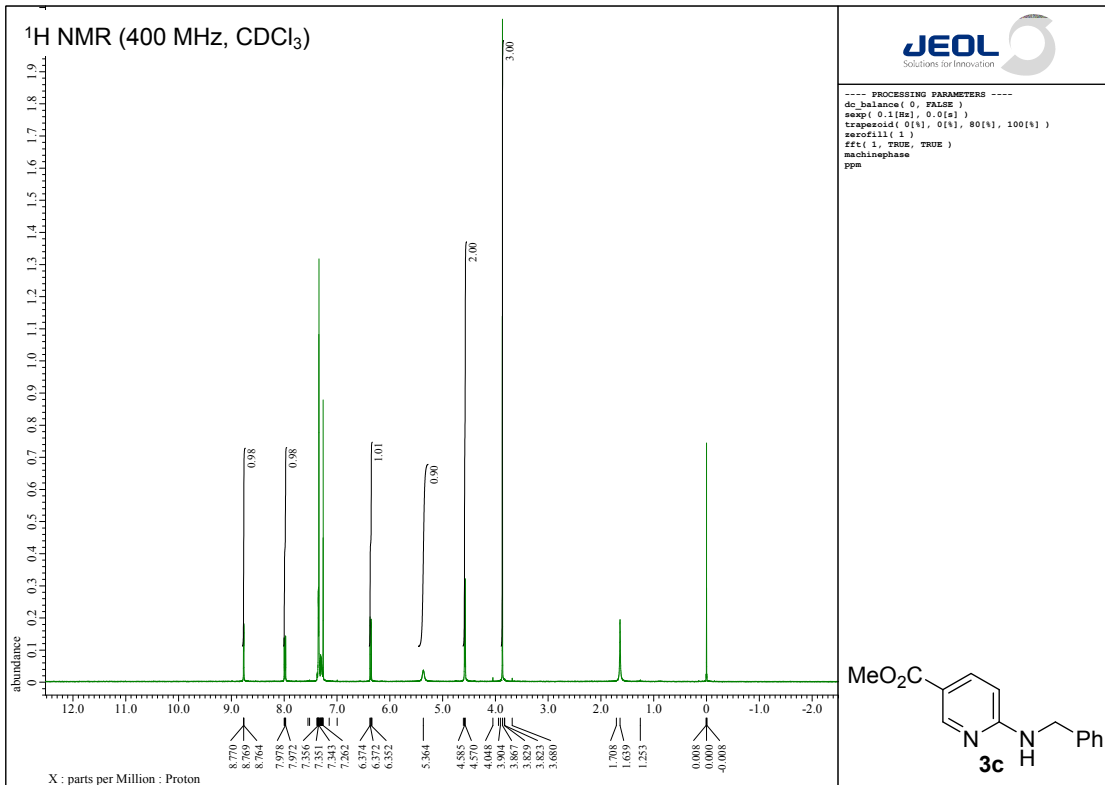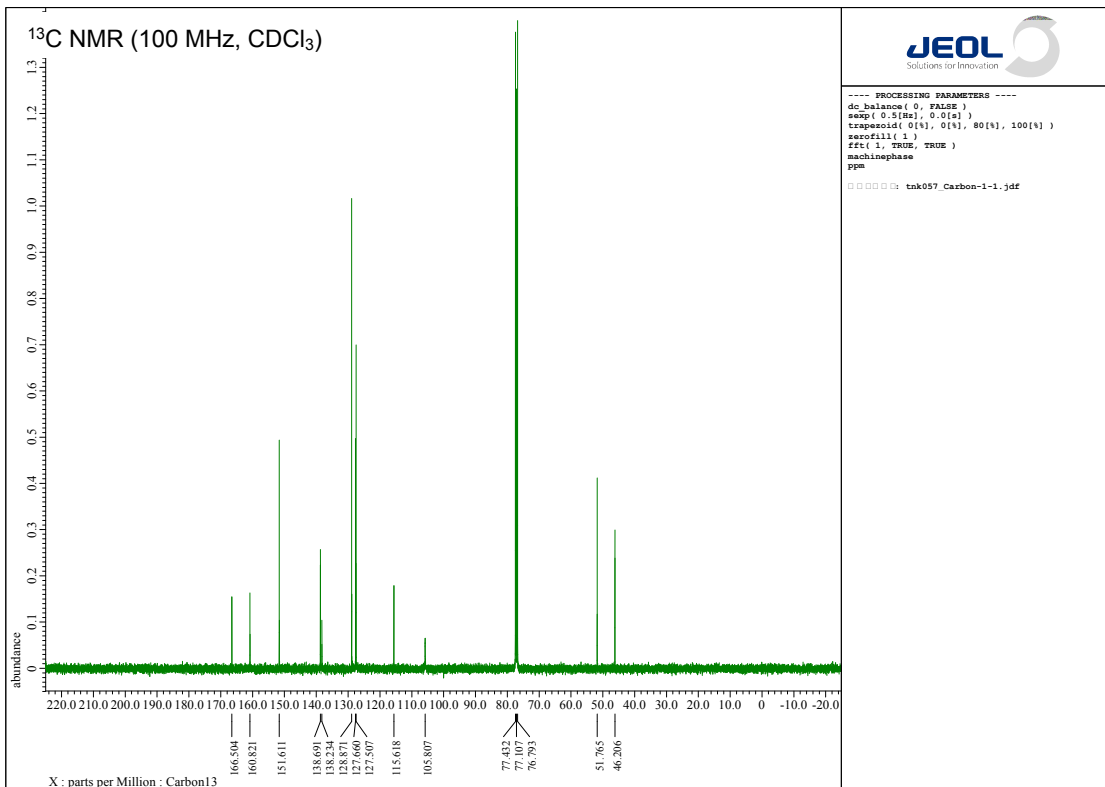

**N-Benzyl-5-methylpyridin-2-amine 3d**

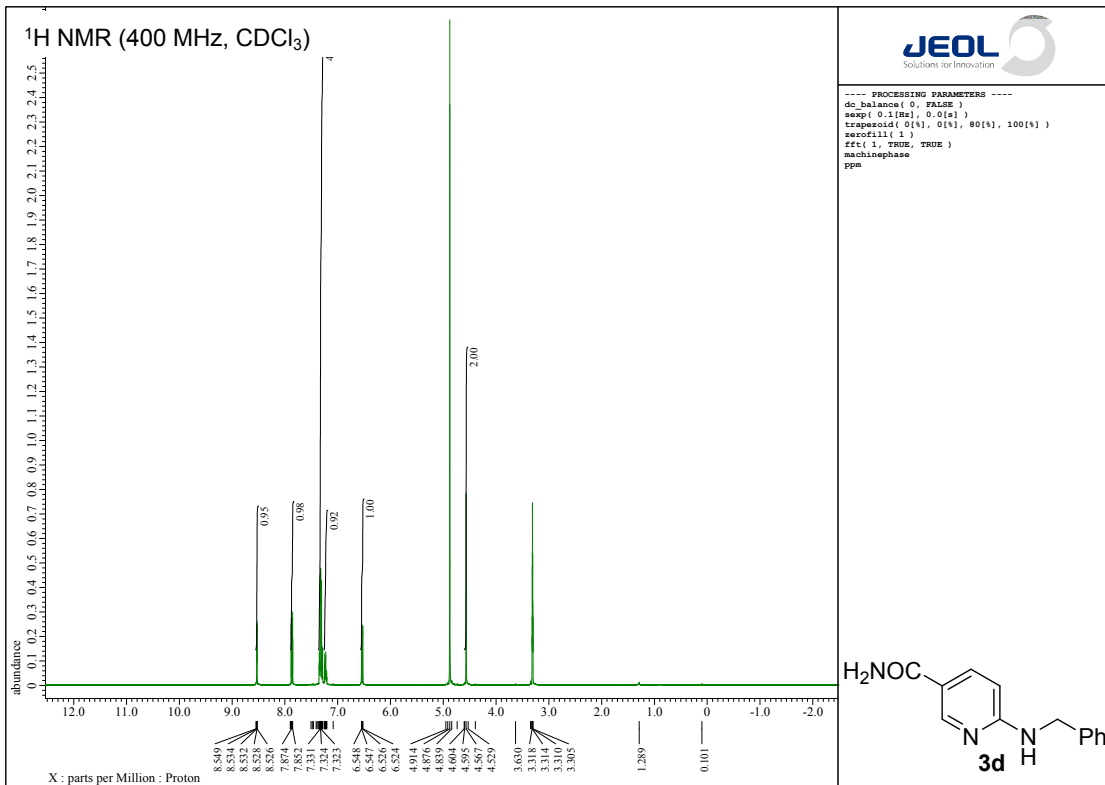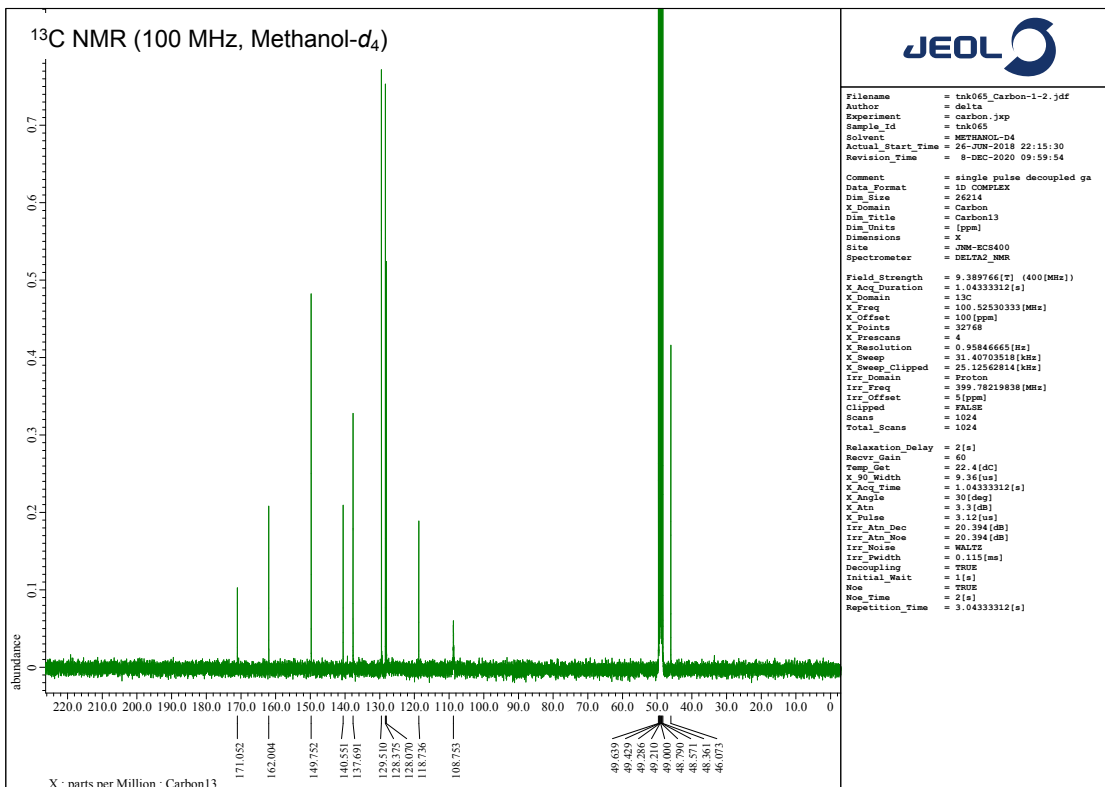



**6-(Benzylamino)nicotinamide 3e**

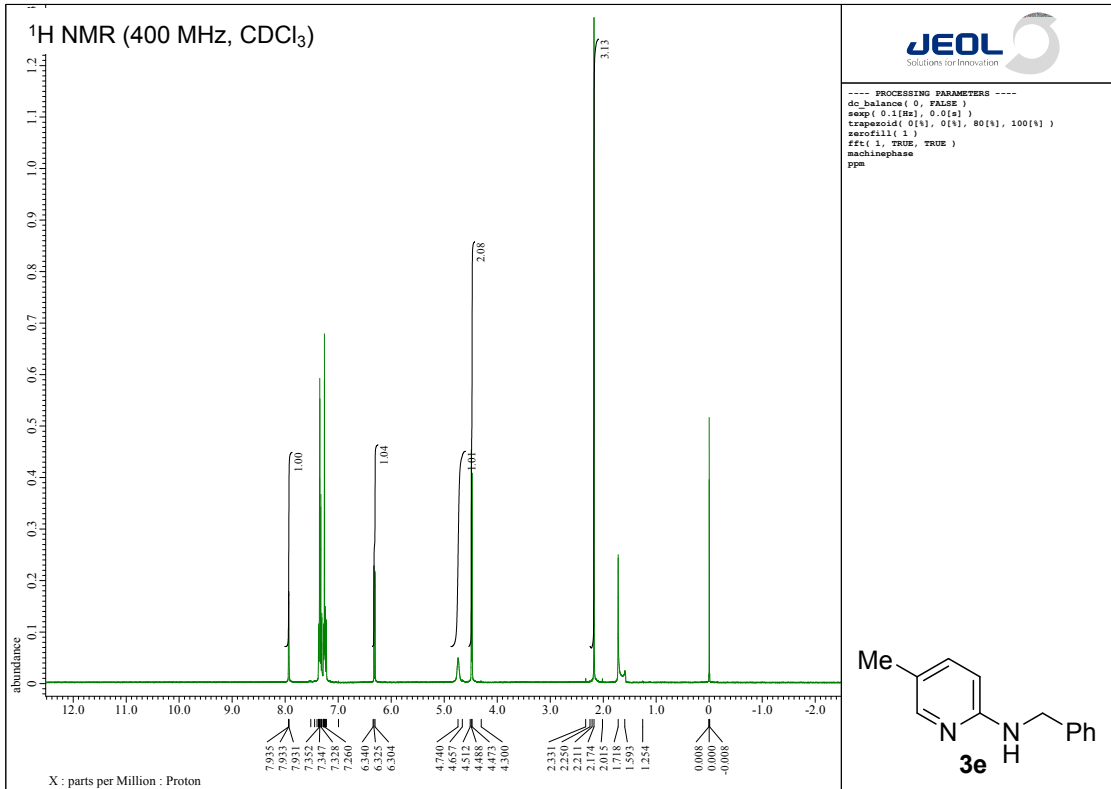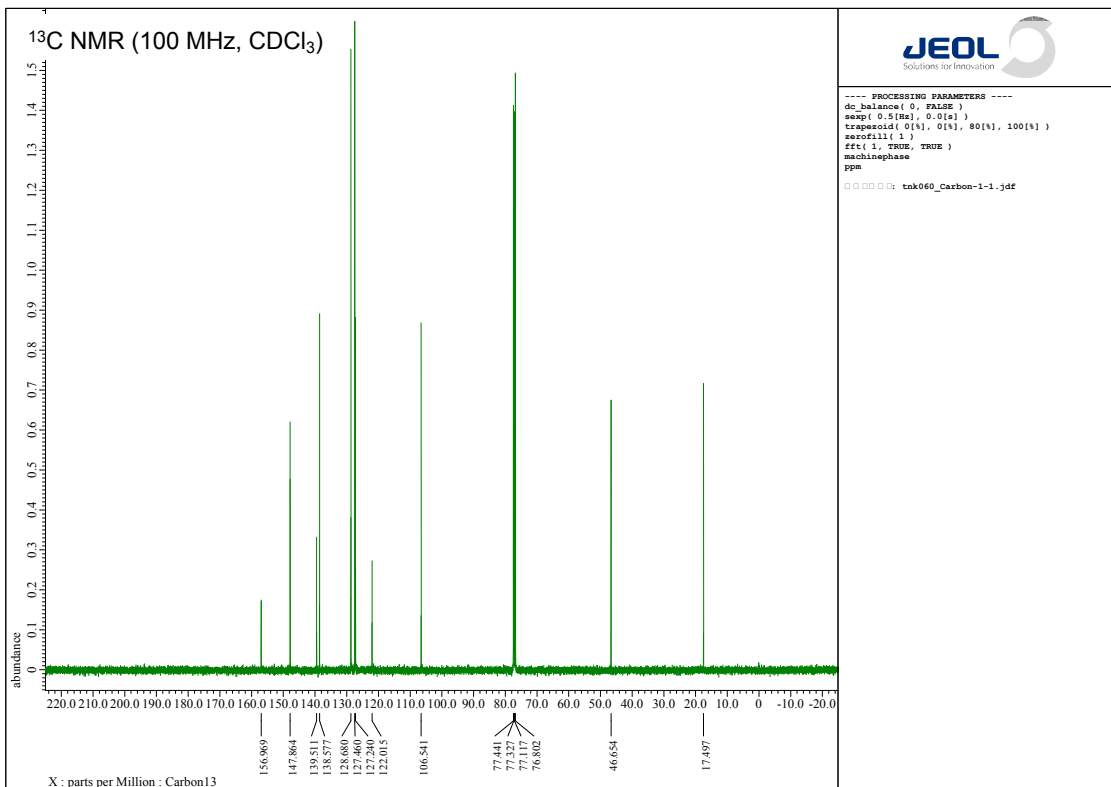

### N-Benzylpyridin-2-amine 3f

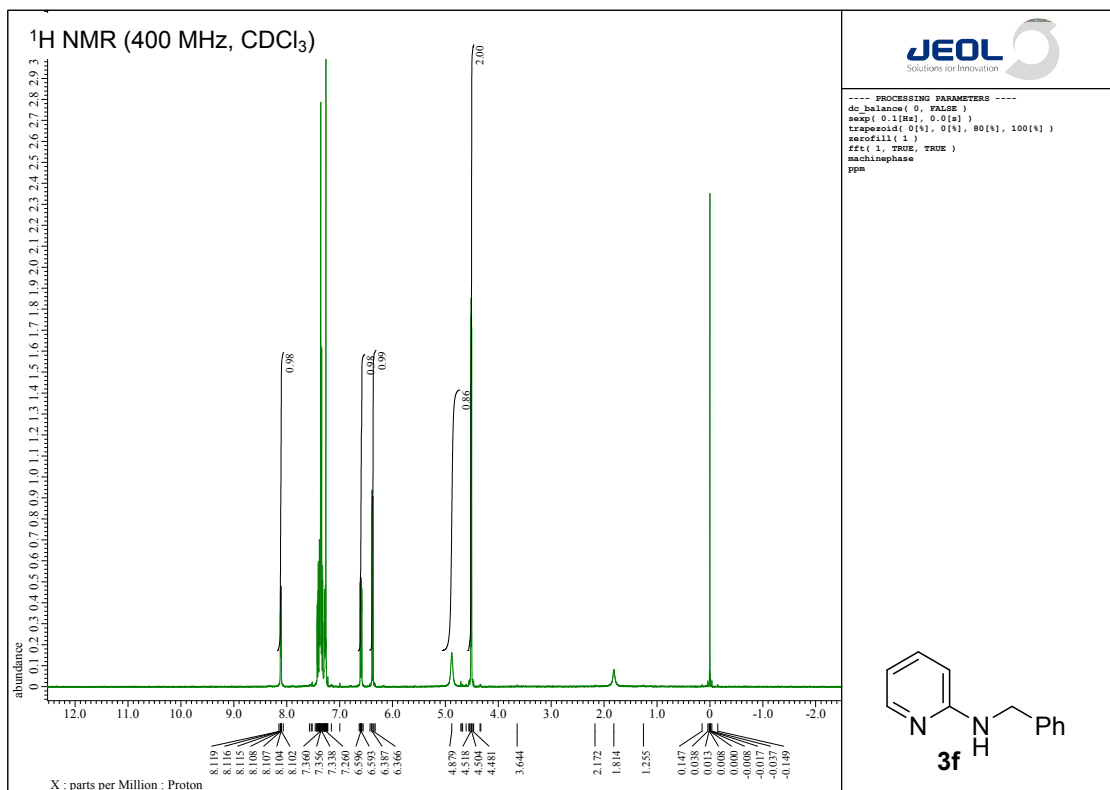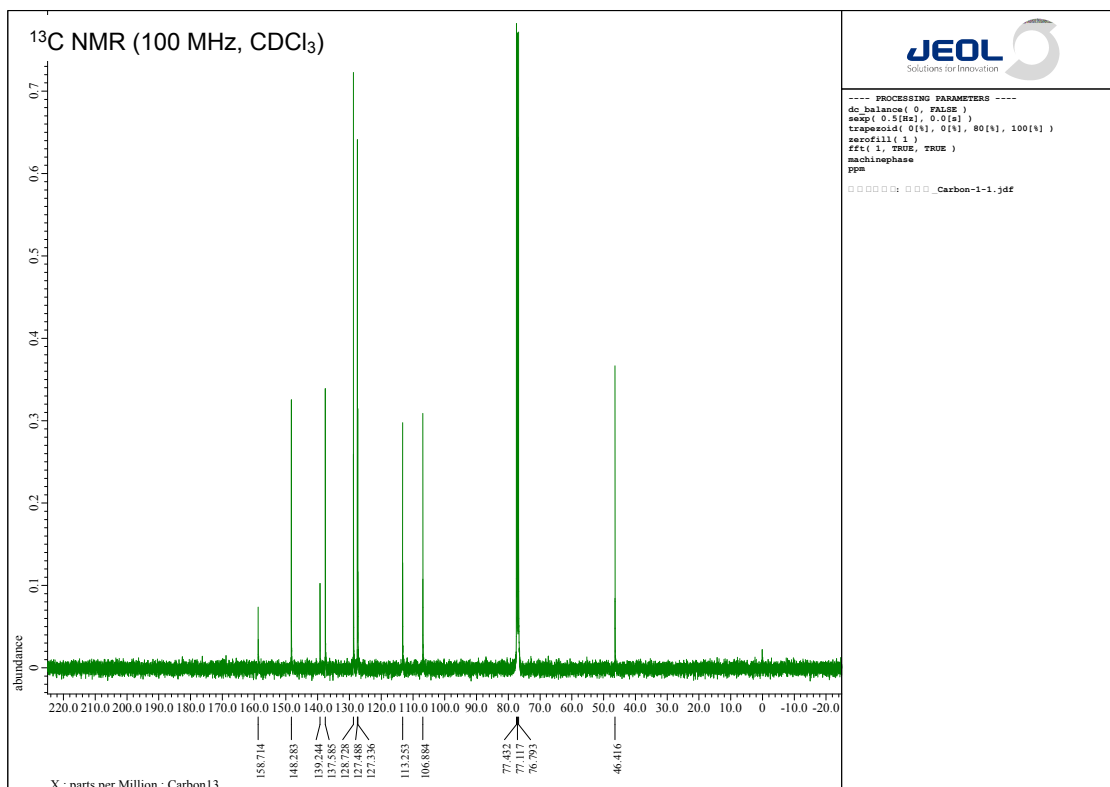

**N-Benzyl-5-nitropyridin-2-amine 3g**

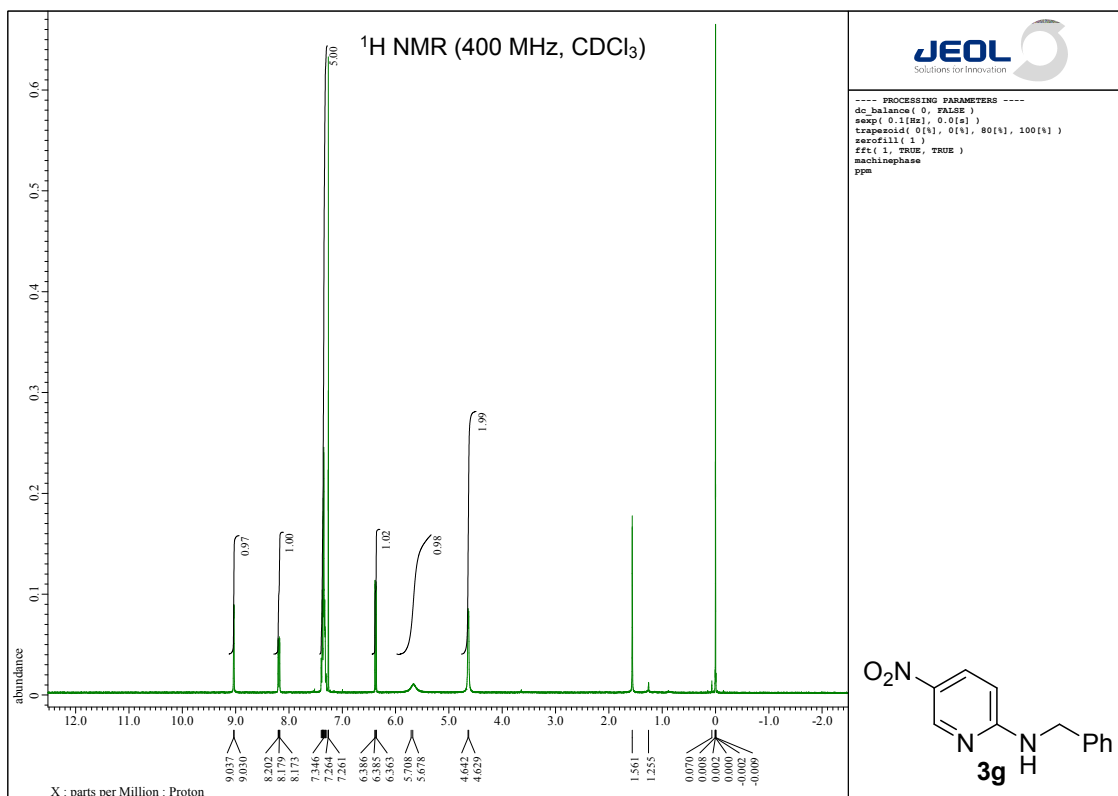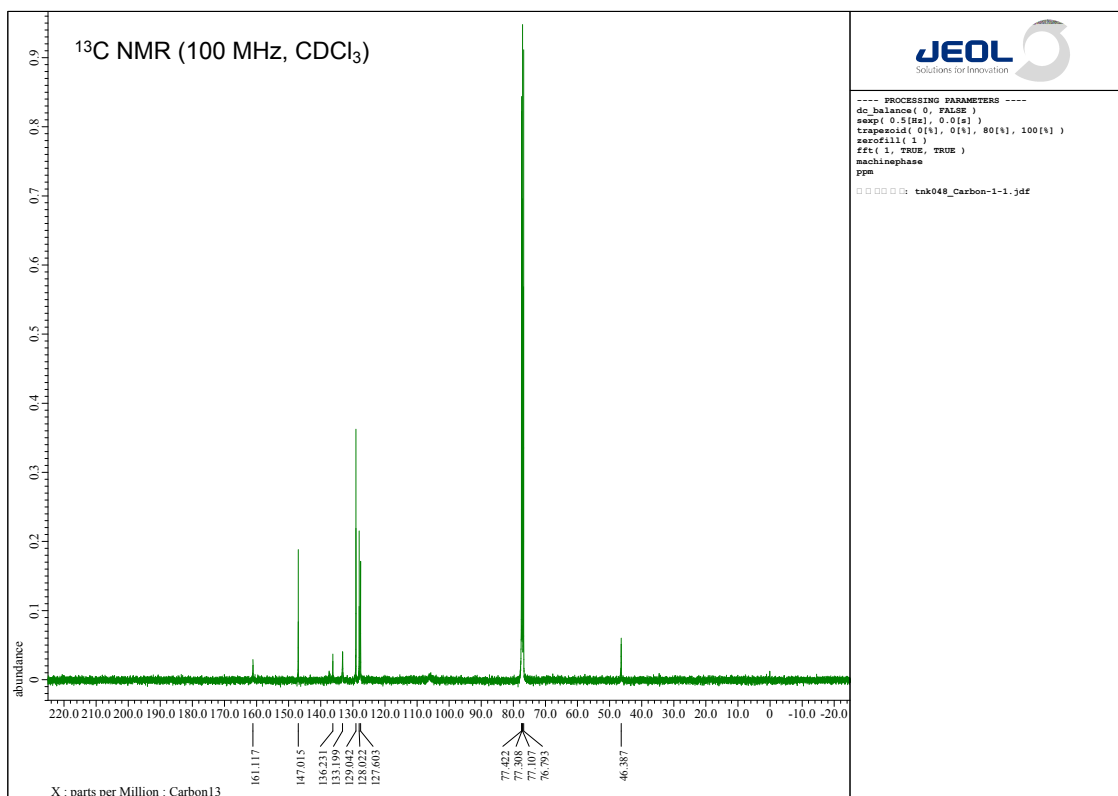

**6-Benzylaminonicotinicacid 3h**

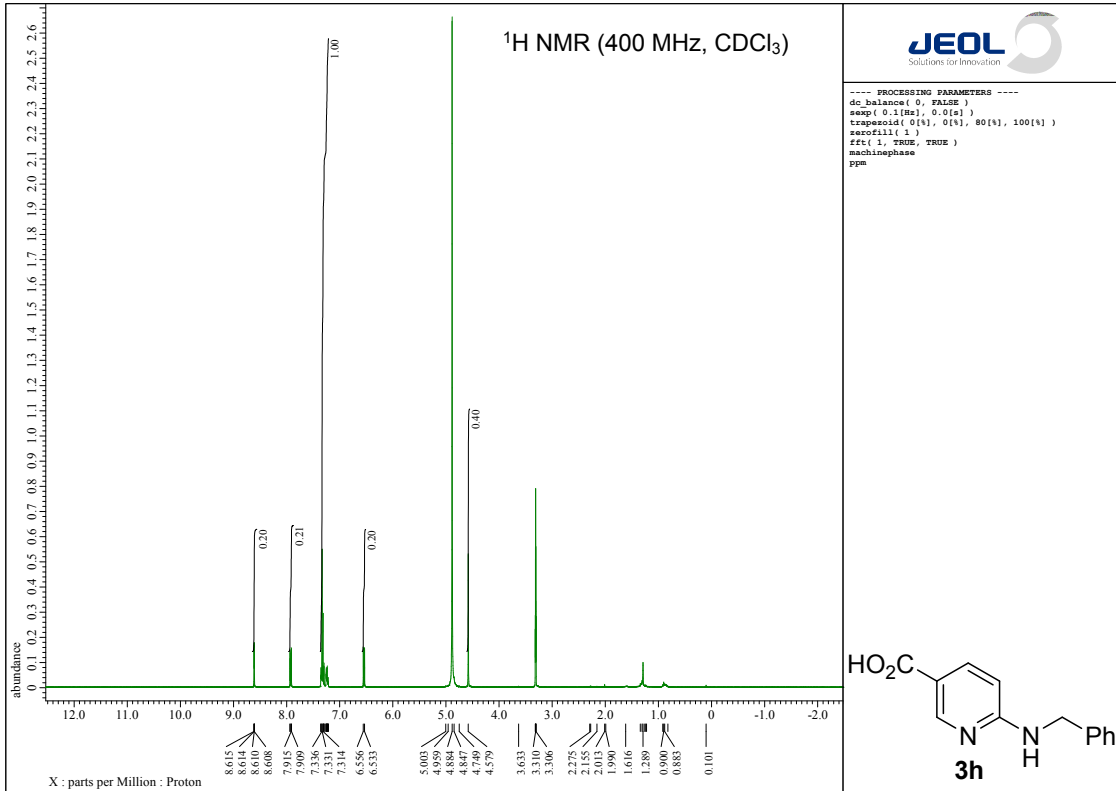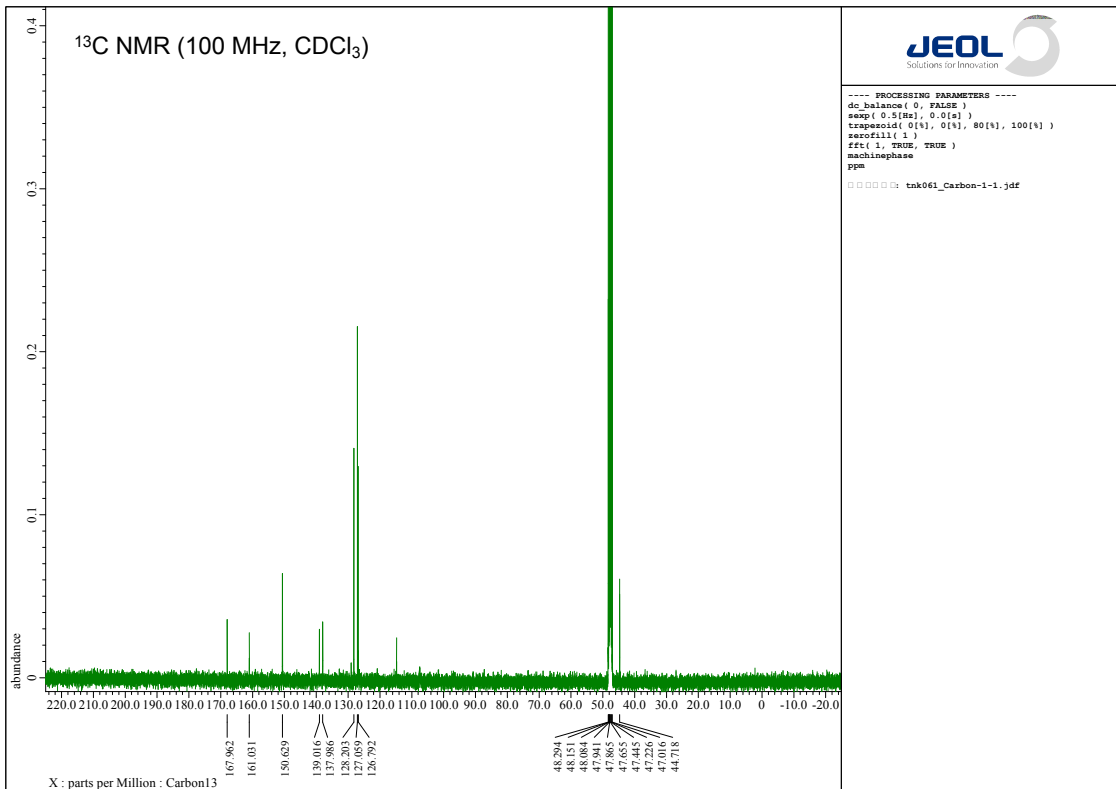

**N-Benzylpyridin-3-amine 3i**

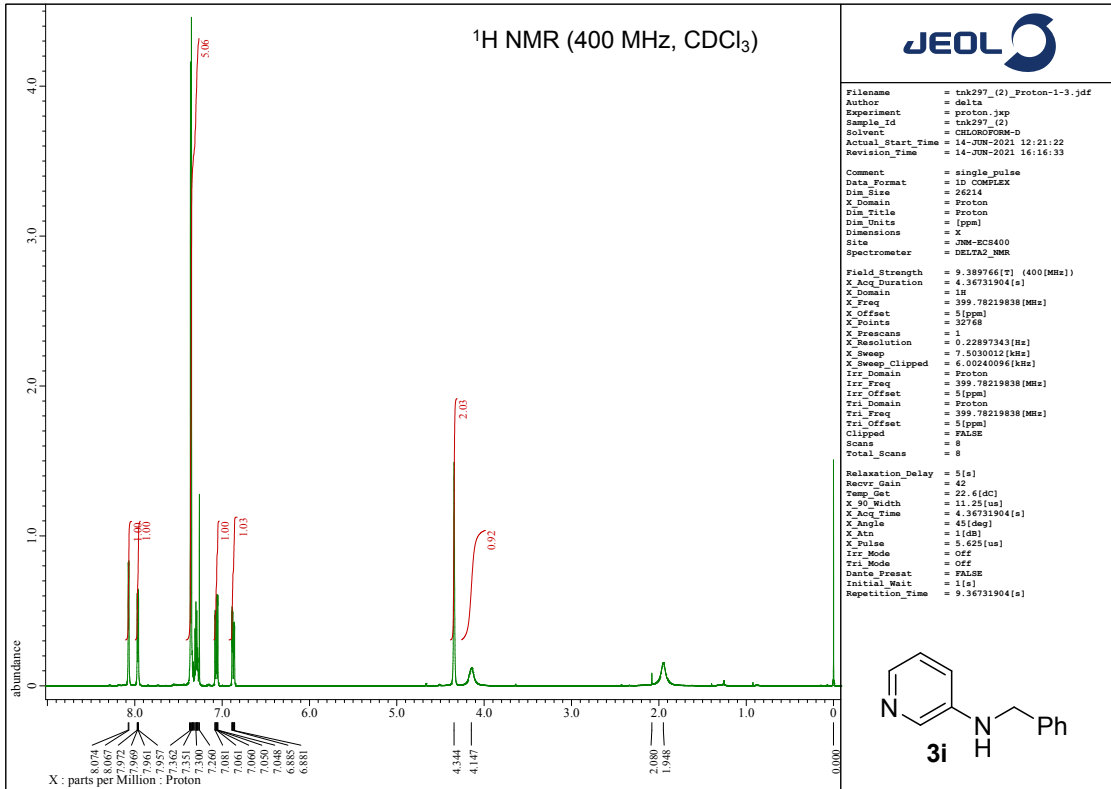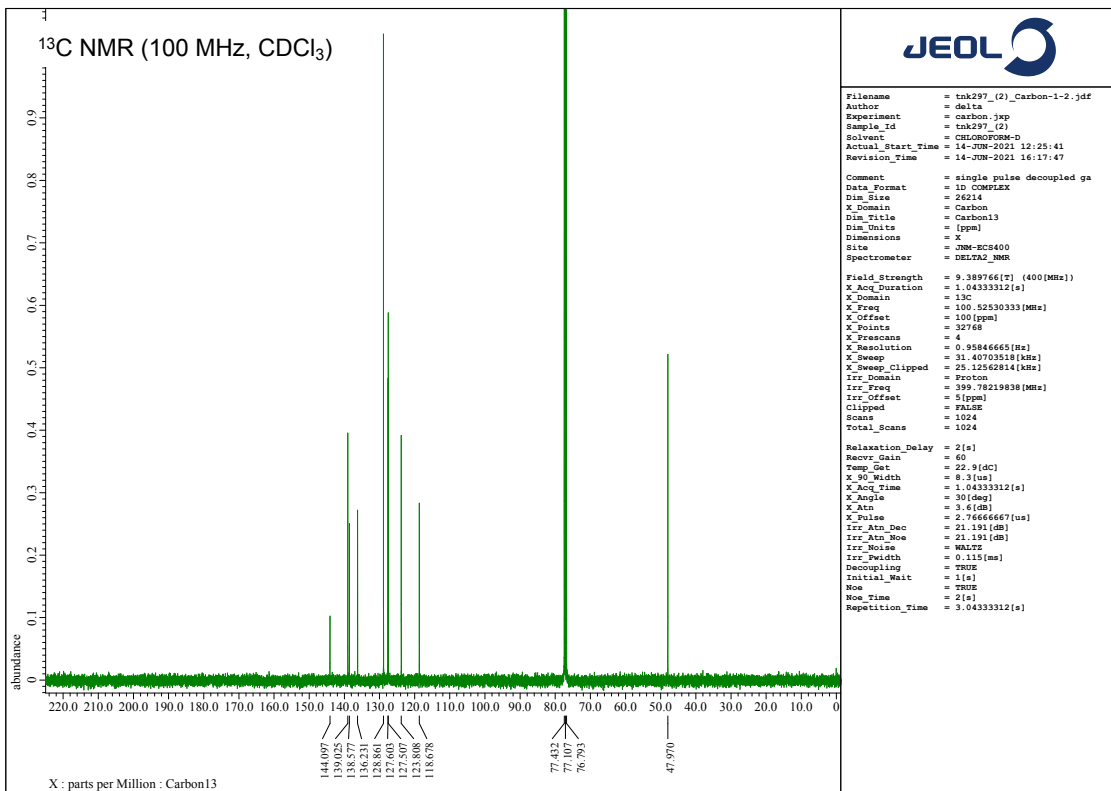

**N-Benzylquinolin-2-amine 3j**

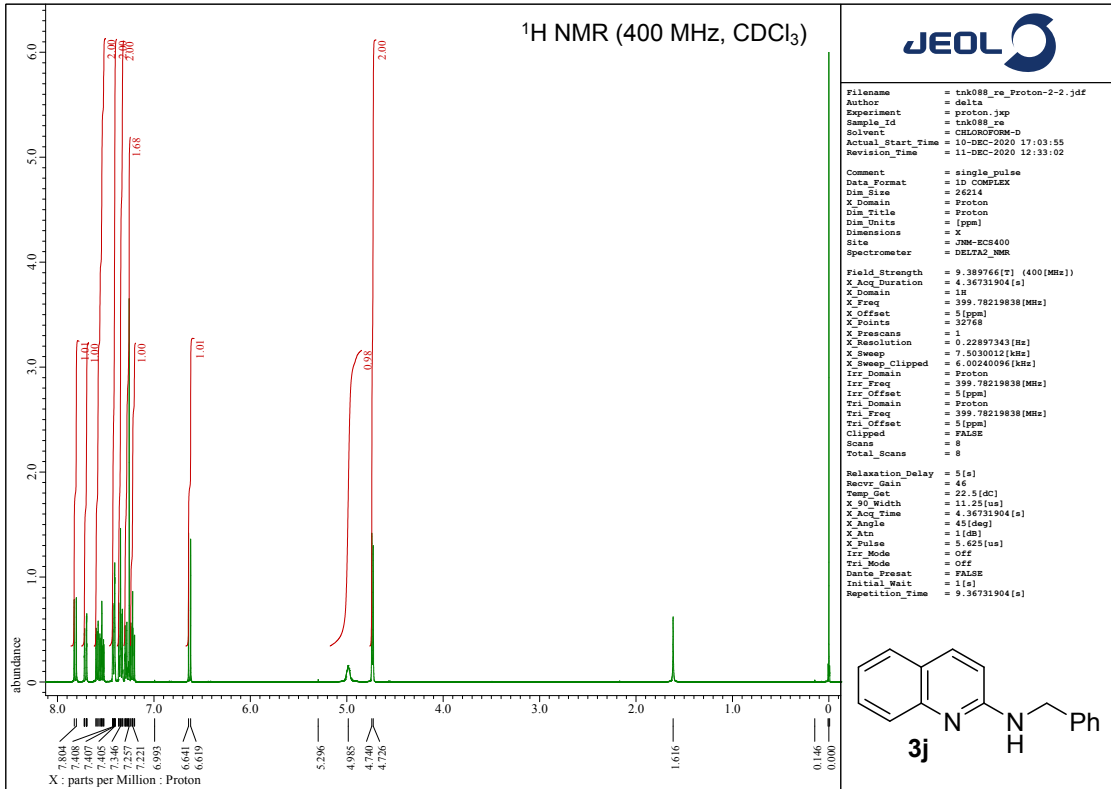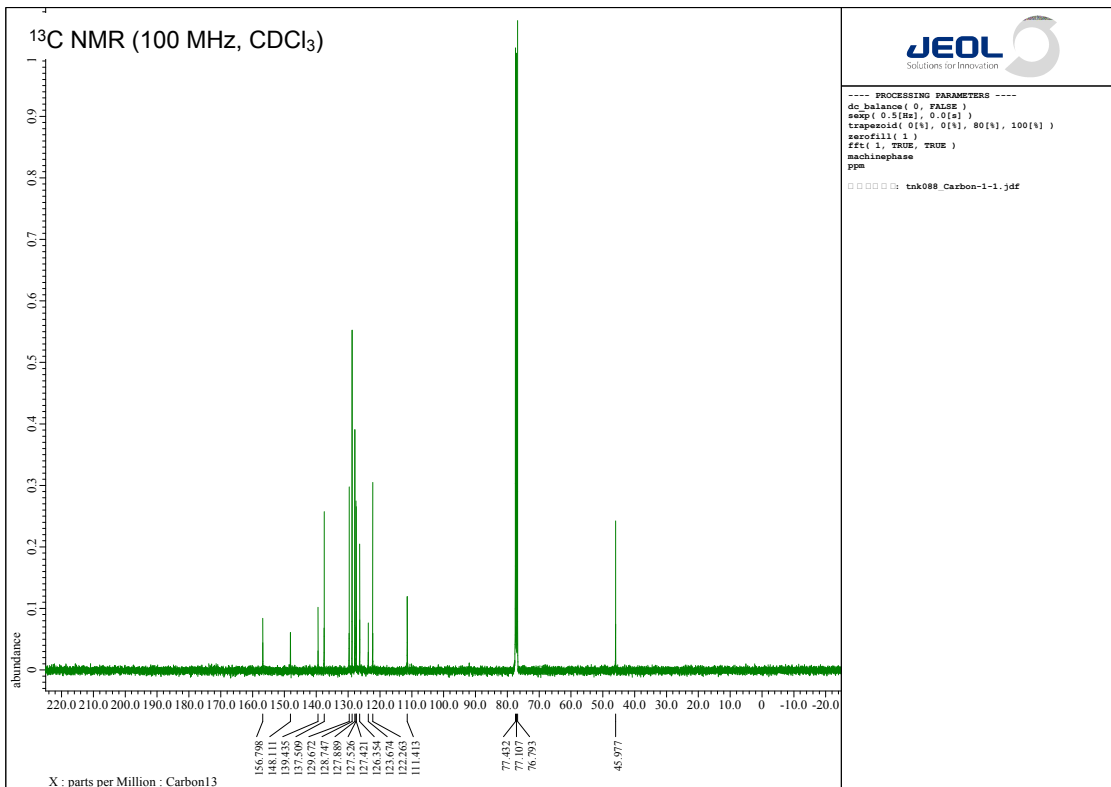

**N-Benzylnicotinamide 3k**

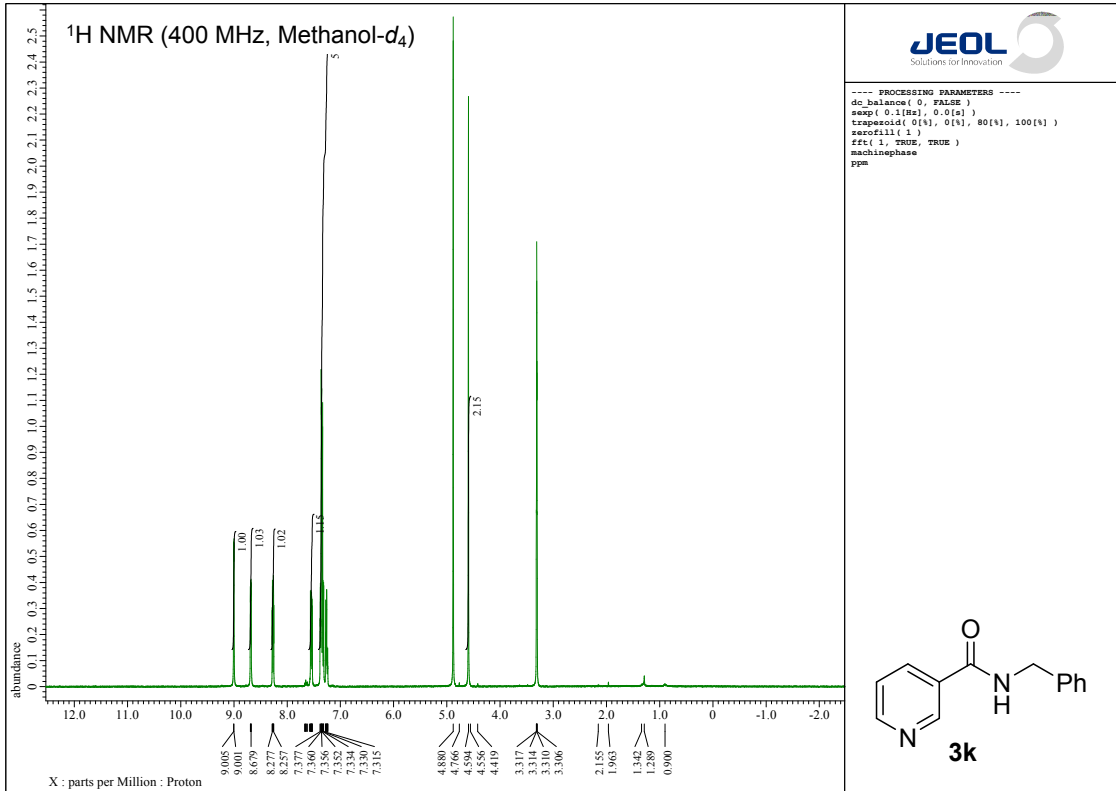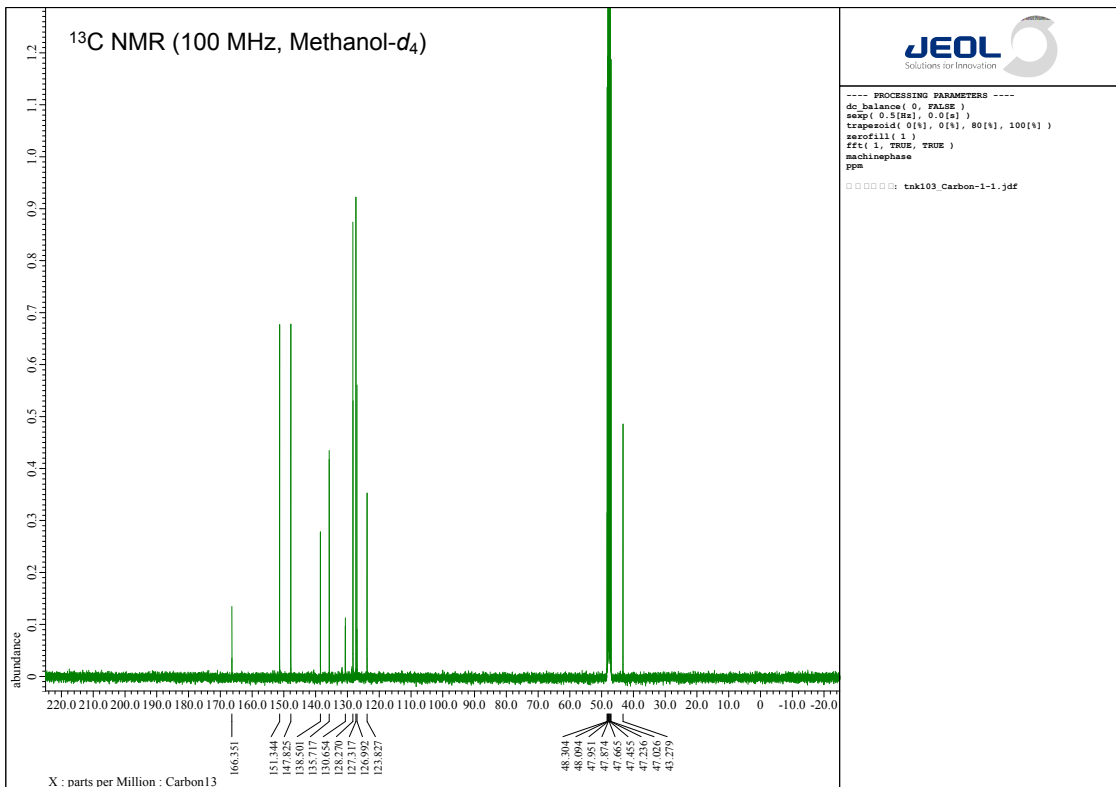

**N-(4-Methoxybenzyl)-5-(trifluoromethyl)pyridin-2-amine 3I**

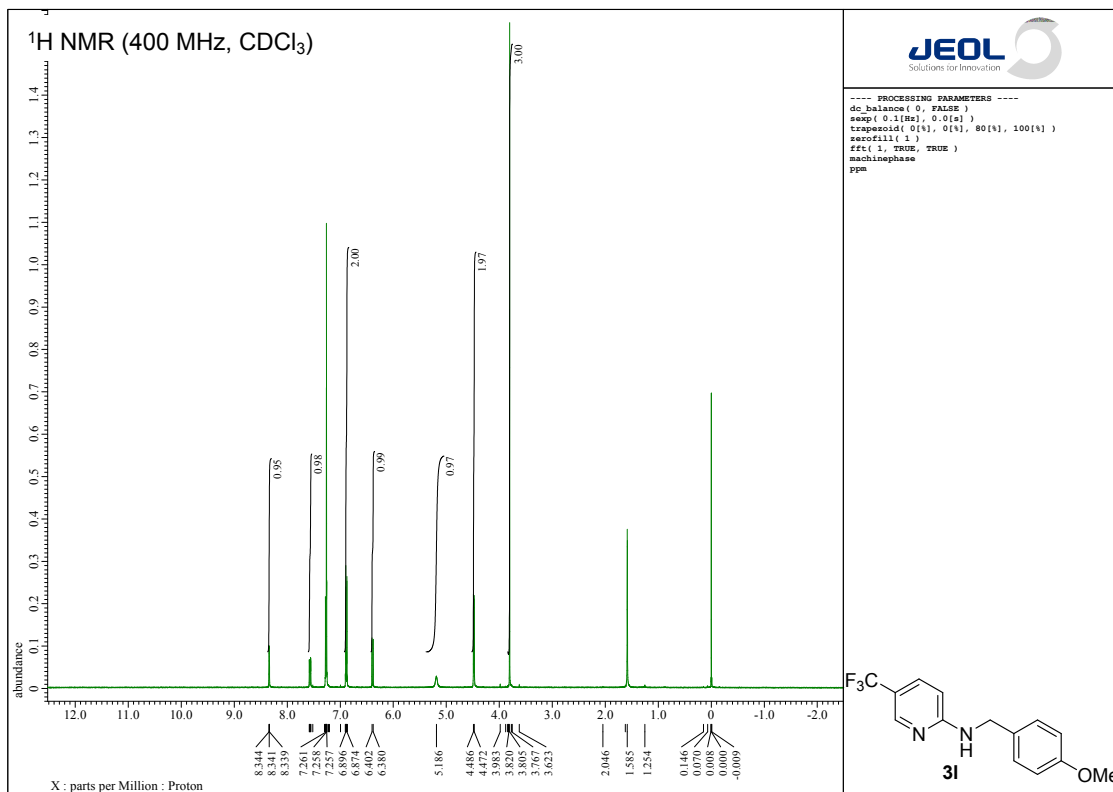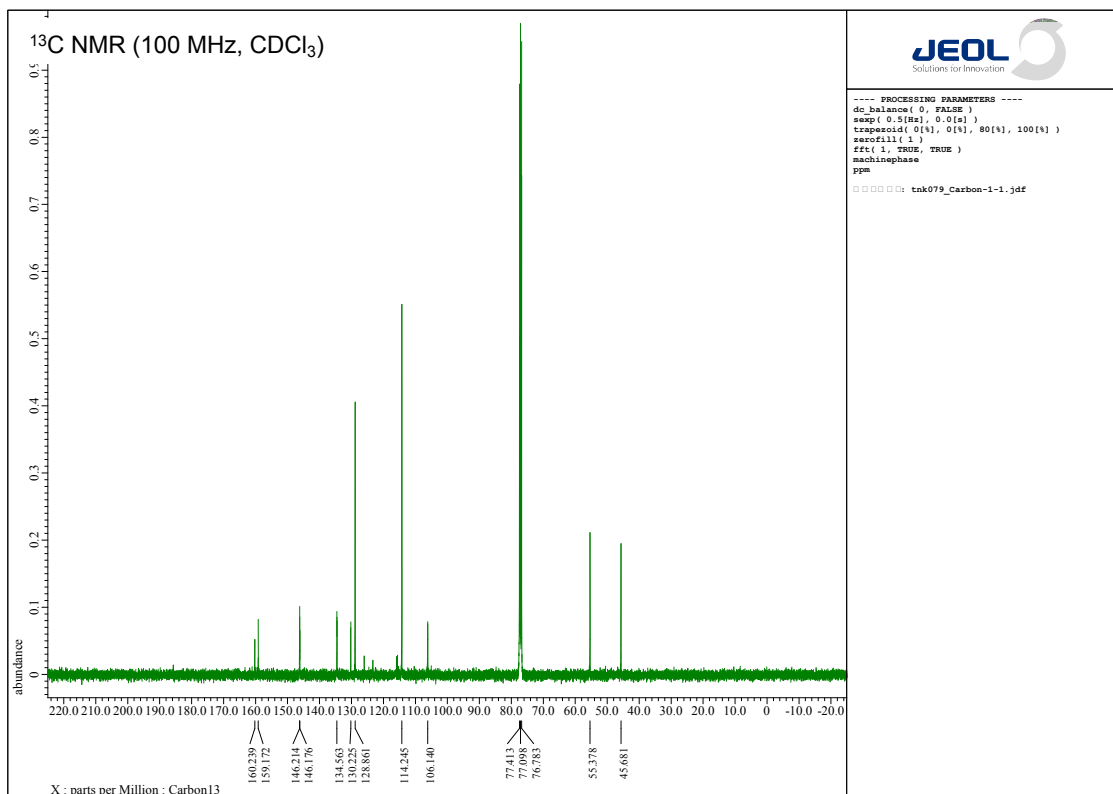



Methyl-6-(4-methoxybenzylamino)nicotinate 3m

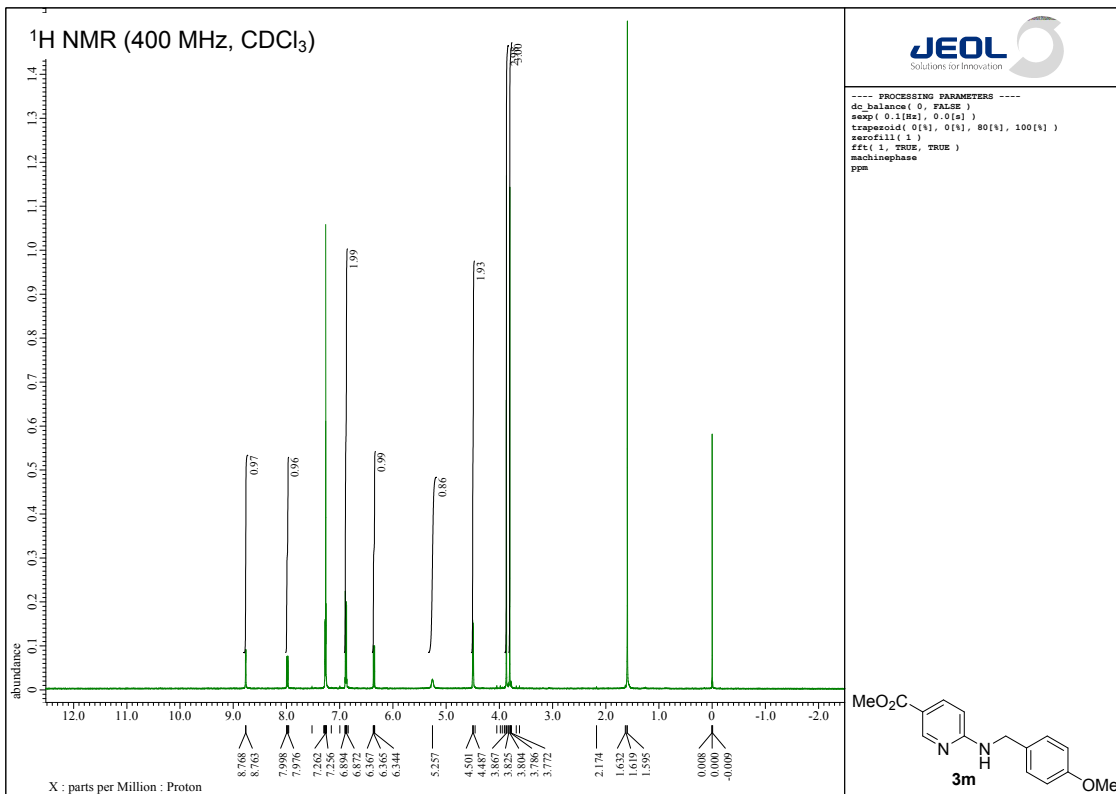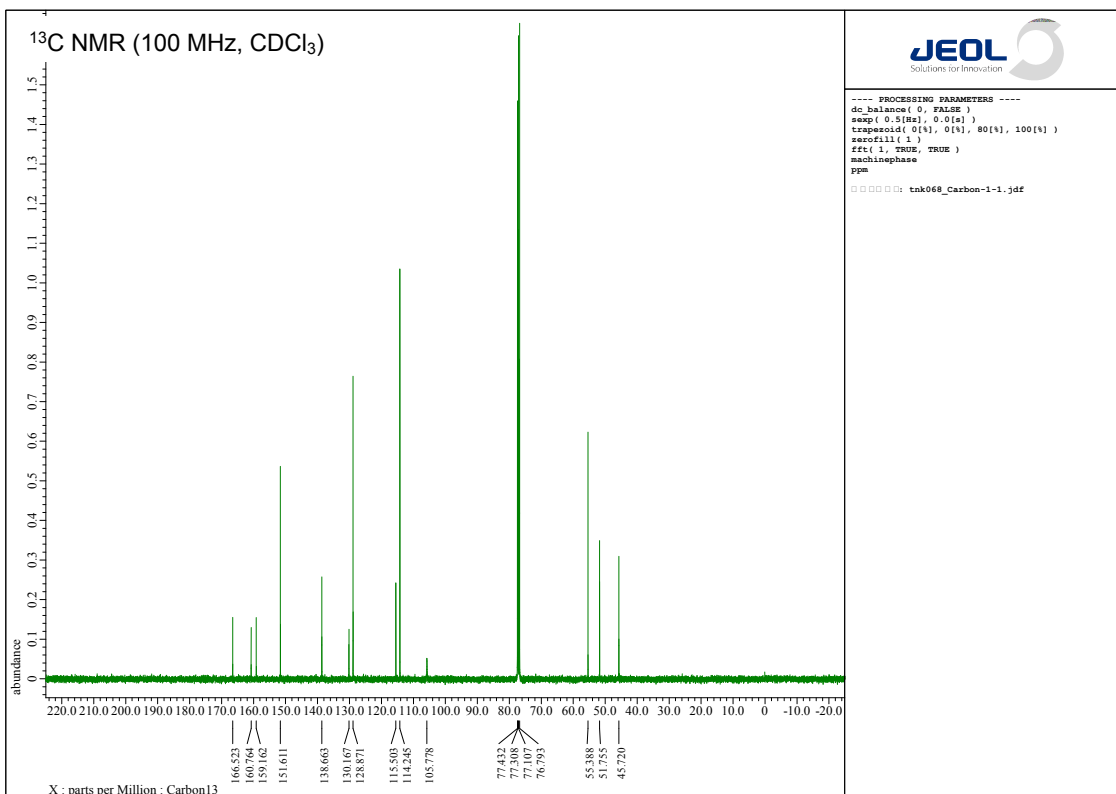



**N-(4-Methoxybenzyl)-5-methylpyridin-2-amine 3o**

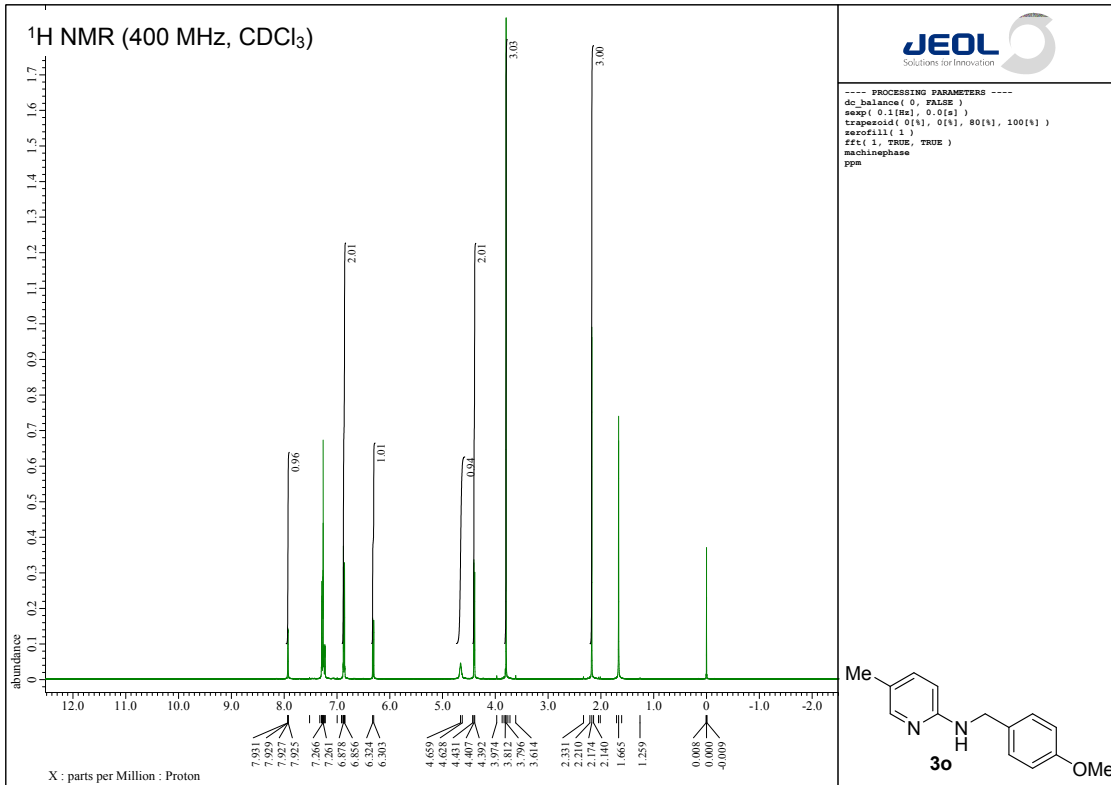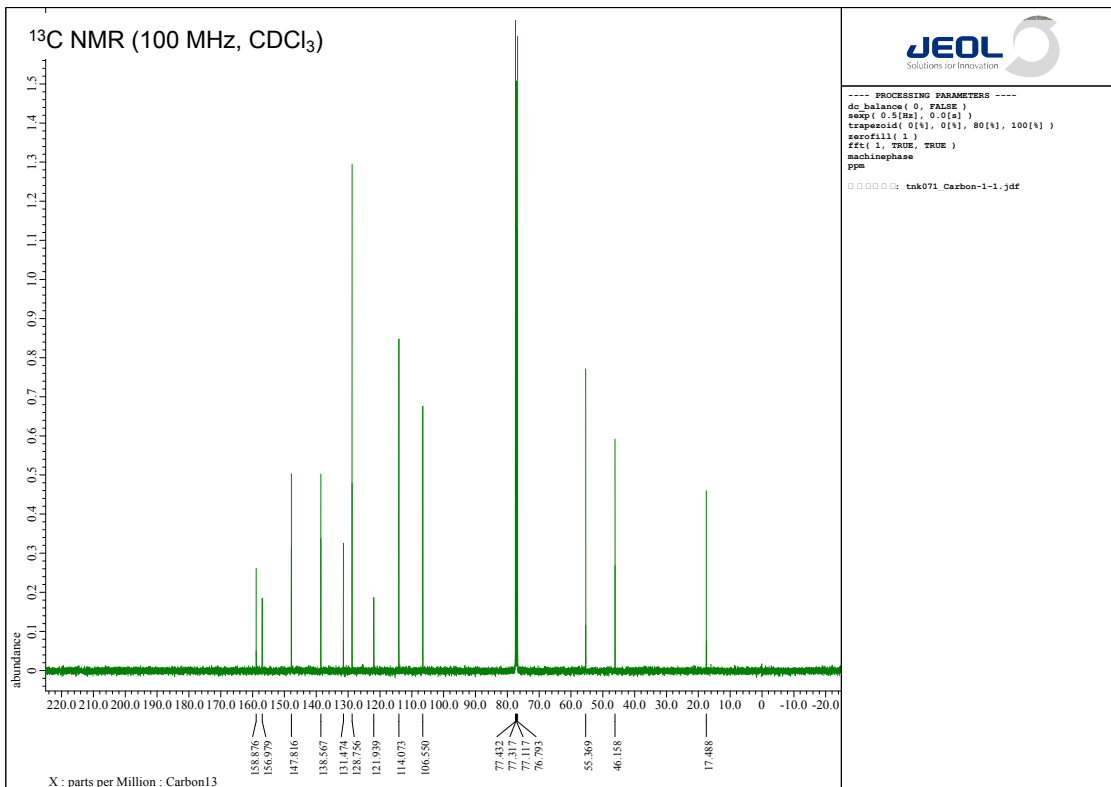

6-(4-Methoxybenzylamino)nicotinamide 3p

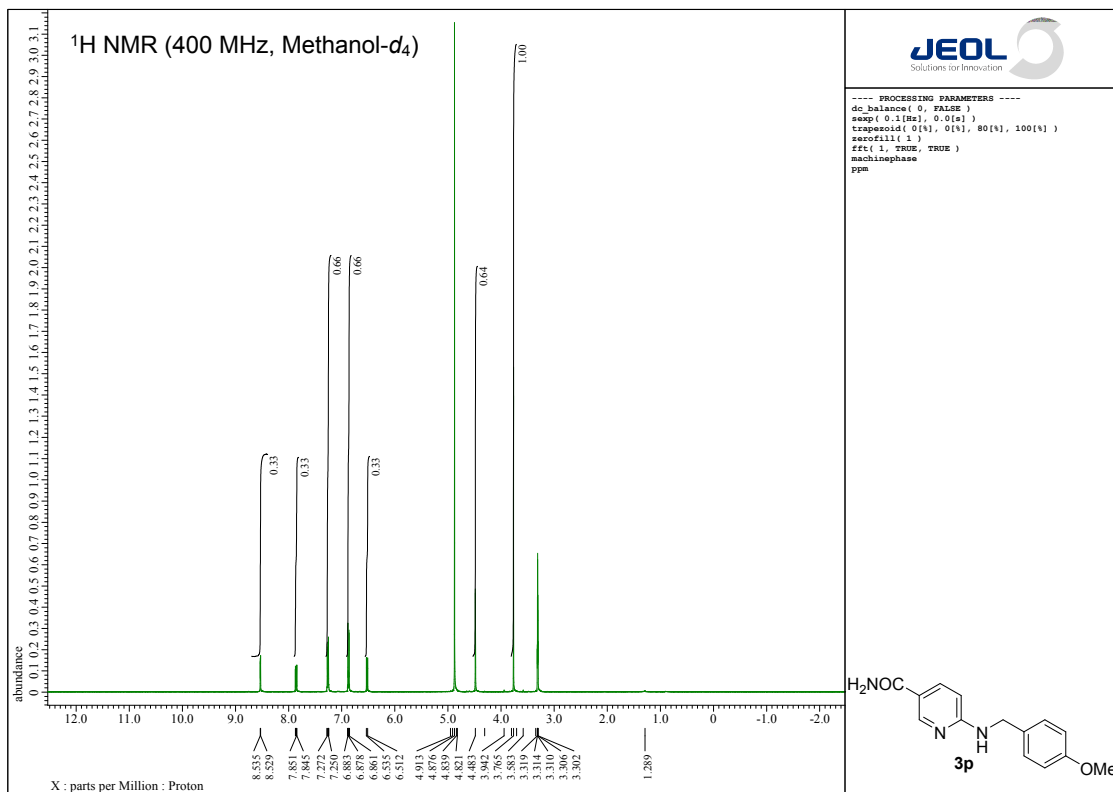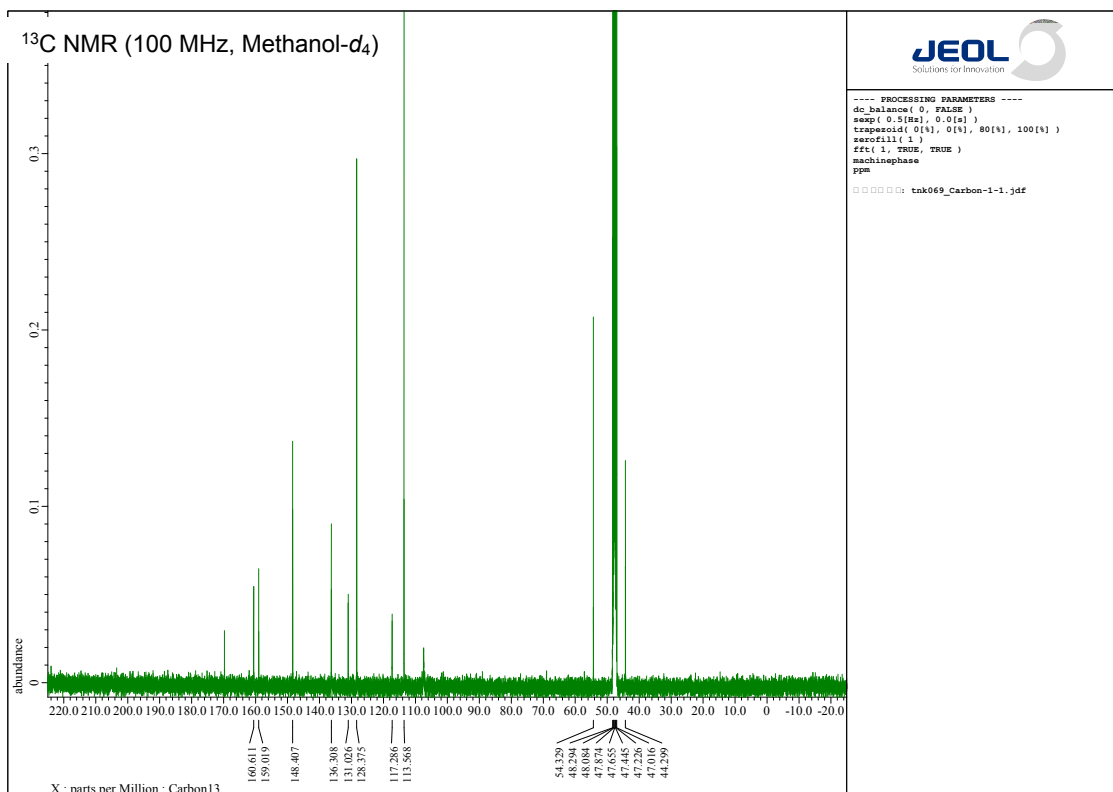

**N-(4-Methylbenzyl)-5-(trifluoromethyl)pyridin-2-amine 3q**

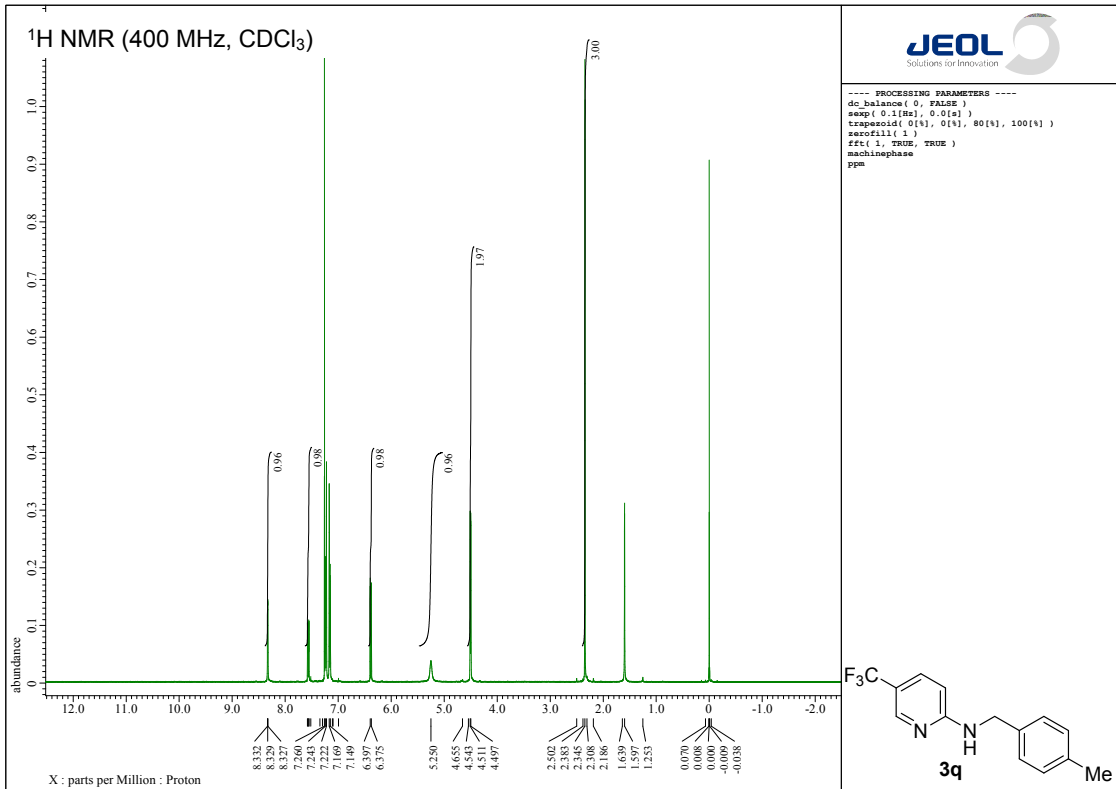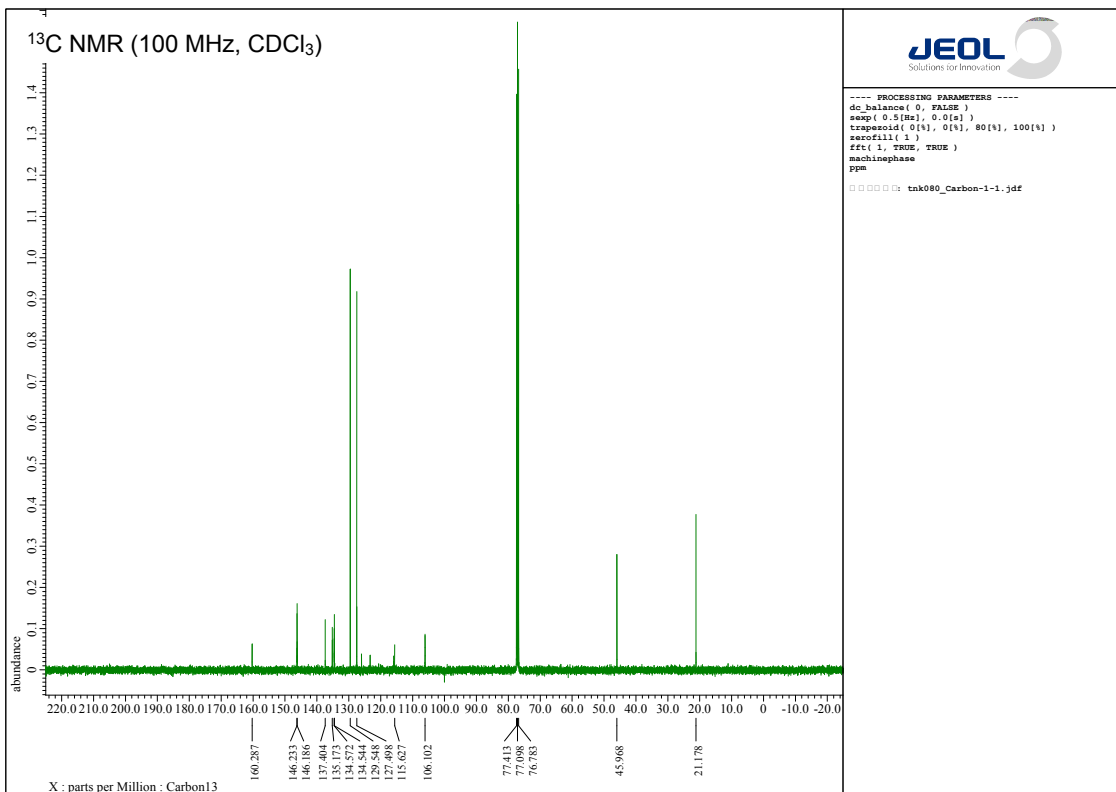

**N-(3-Methylbenzyl)-5-(trifluoromethyl)pyridin-2-amine 3r**

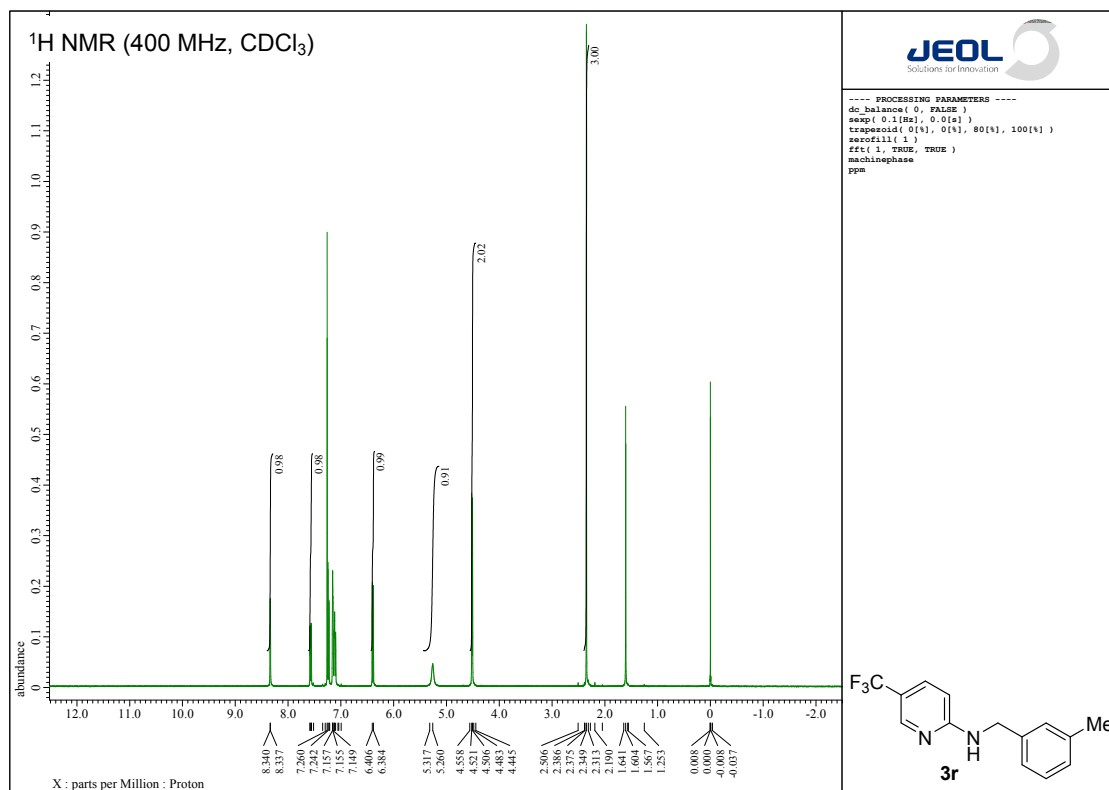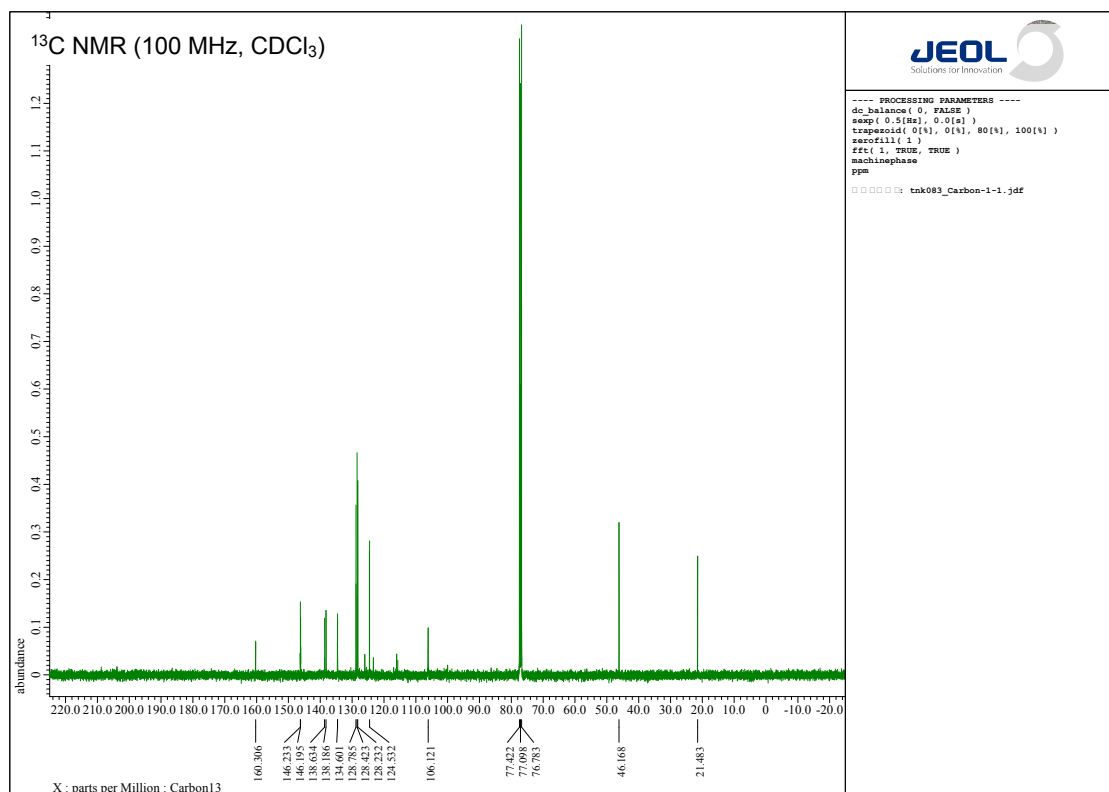

**N-(2-Methoxybenzyl)-5-(trifluoromethyl)pyridin-2-amine 3s**

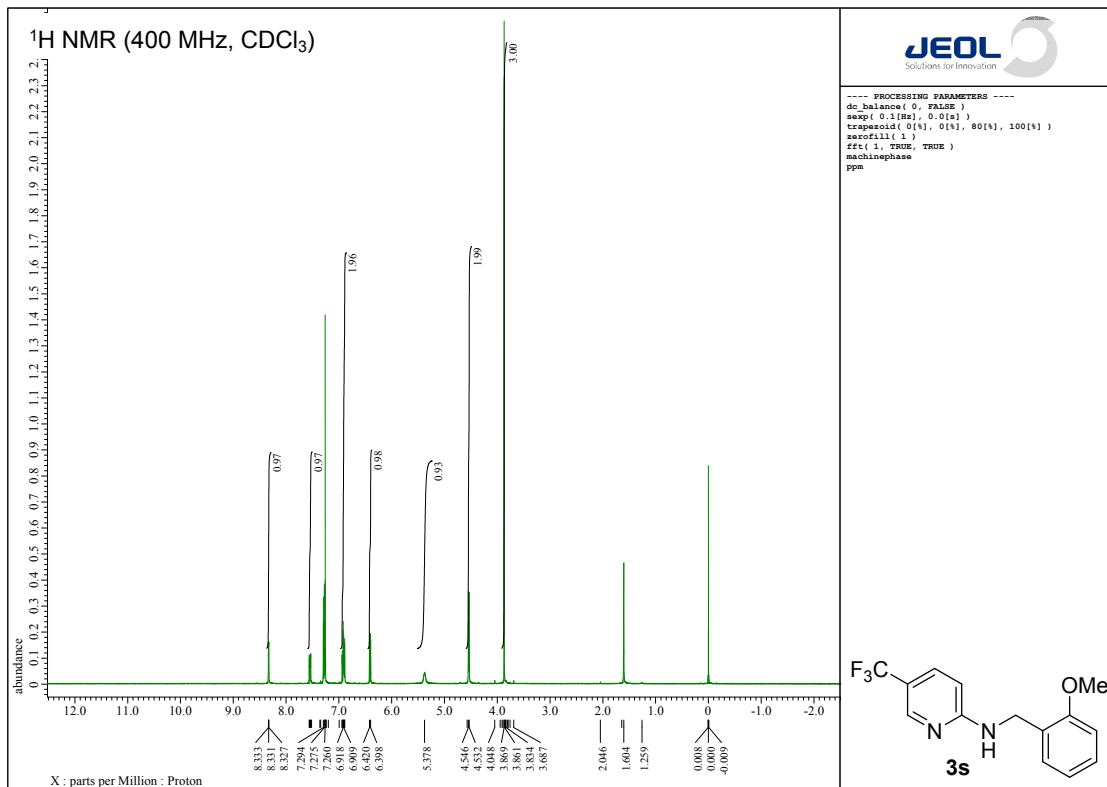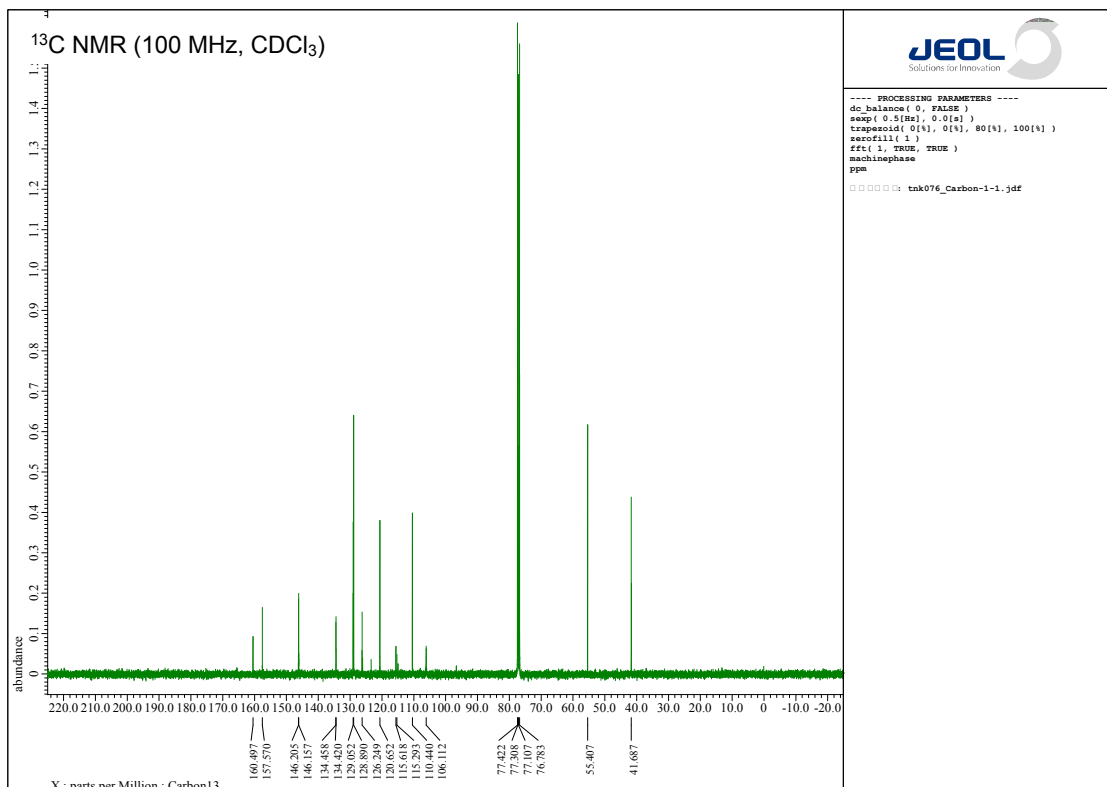

**N-(4-Fluorobenzyl)-5-(trifluoromethyl)pyridin-2-amine 3t**

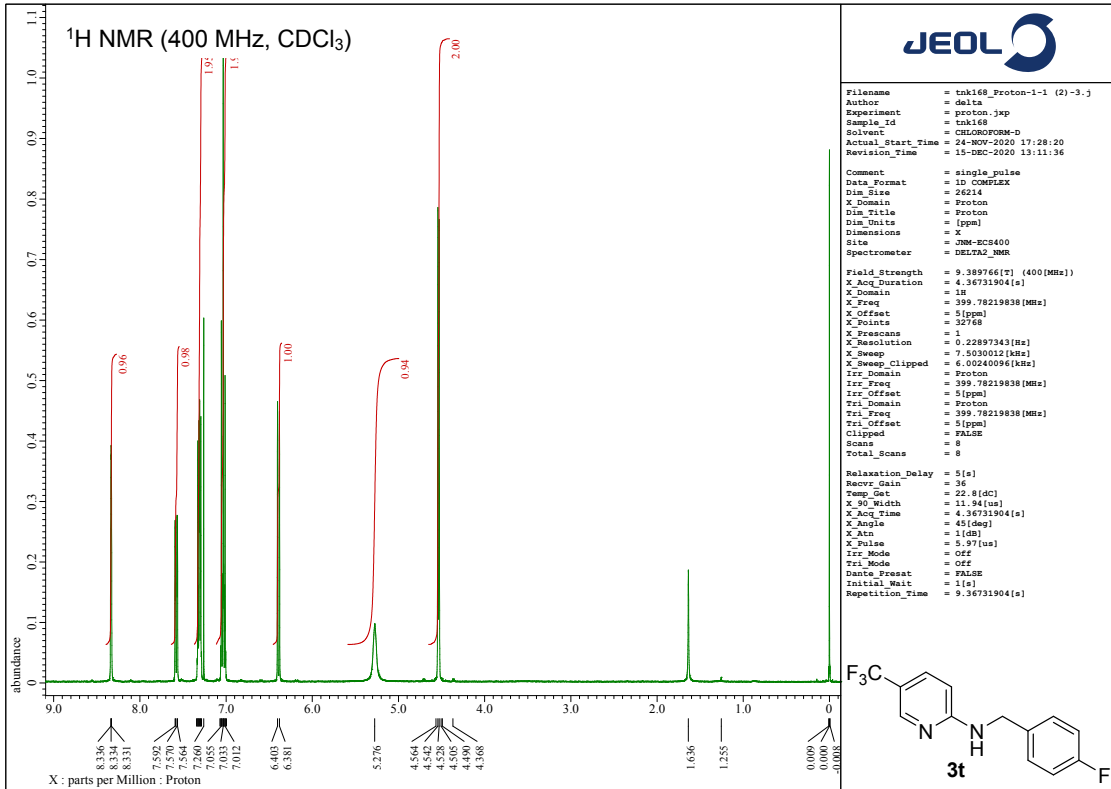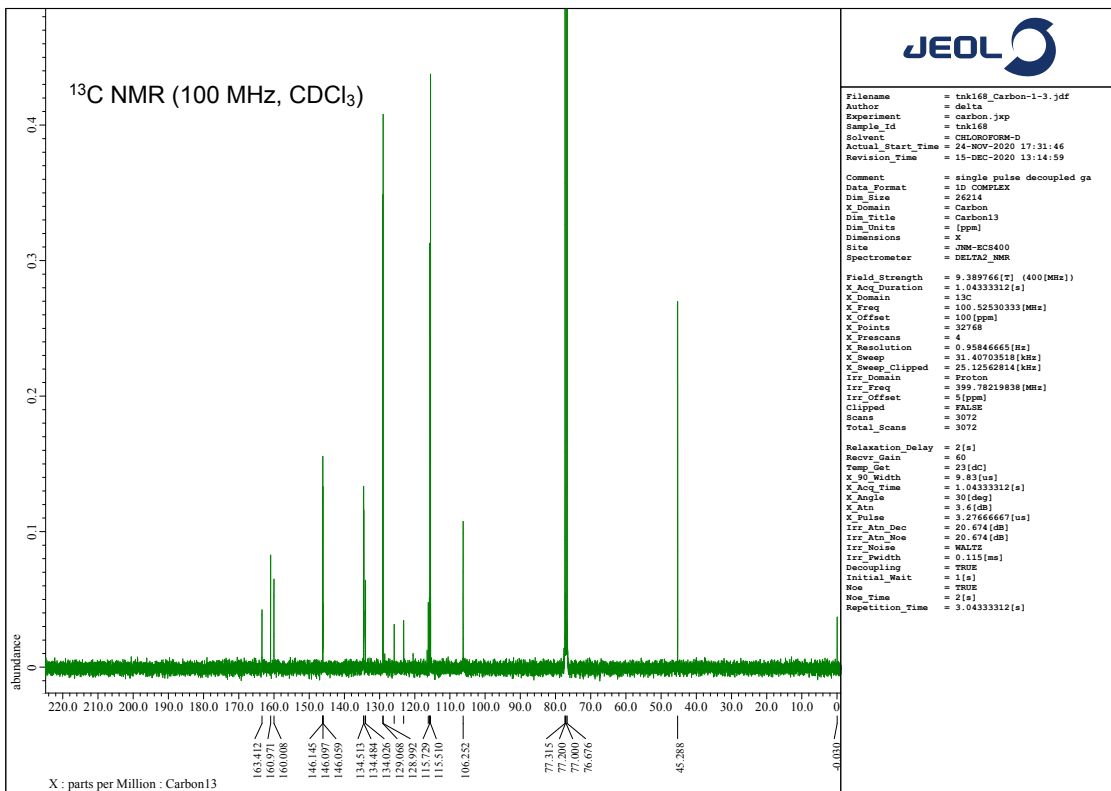



**N-(3-Fluorobenzyl)-5-(trifluoromethyl)pyridin-2-amine 3u**

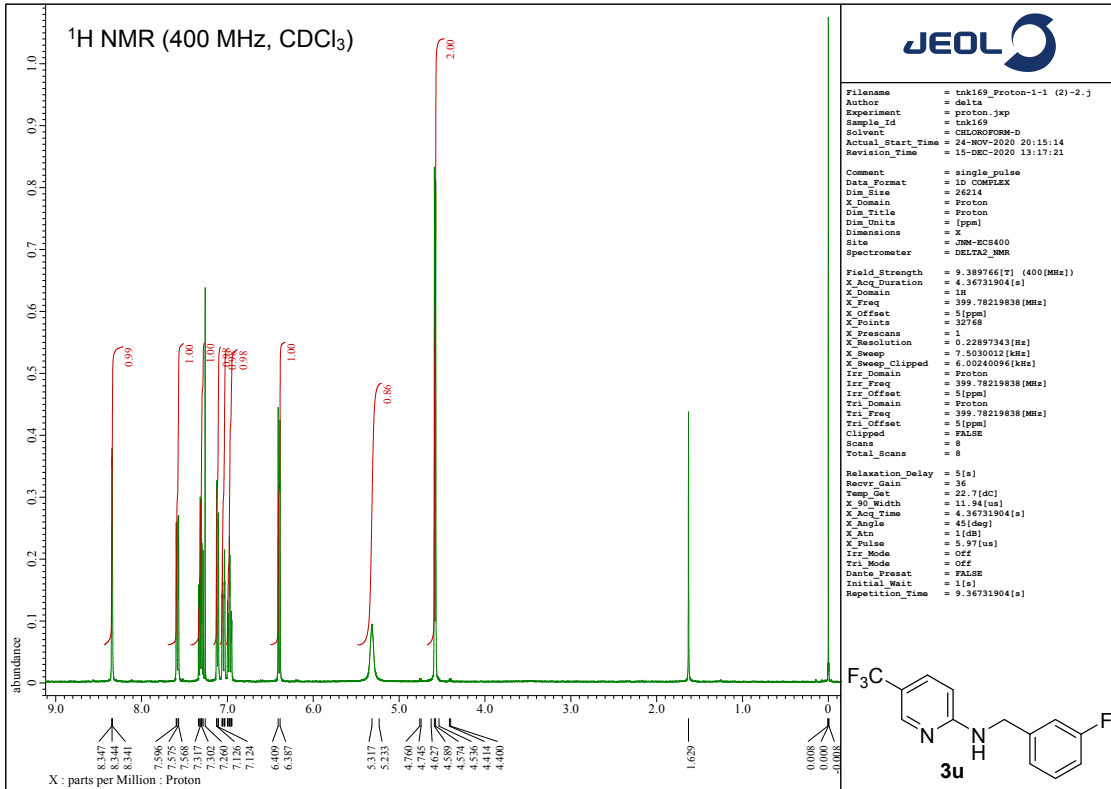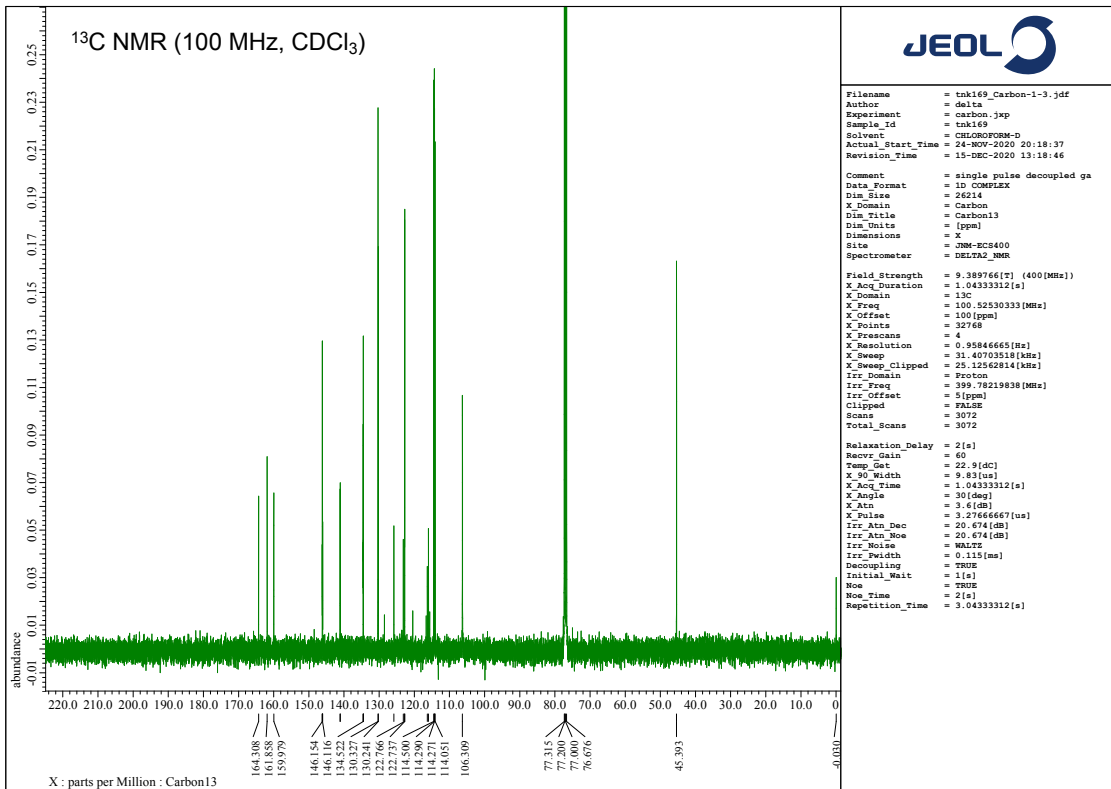

5-Fluoro-N-(4-fluorobenzyl)pyridin-2-amine 3v

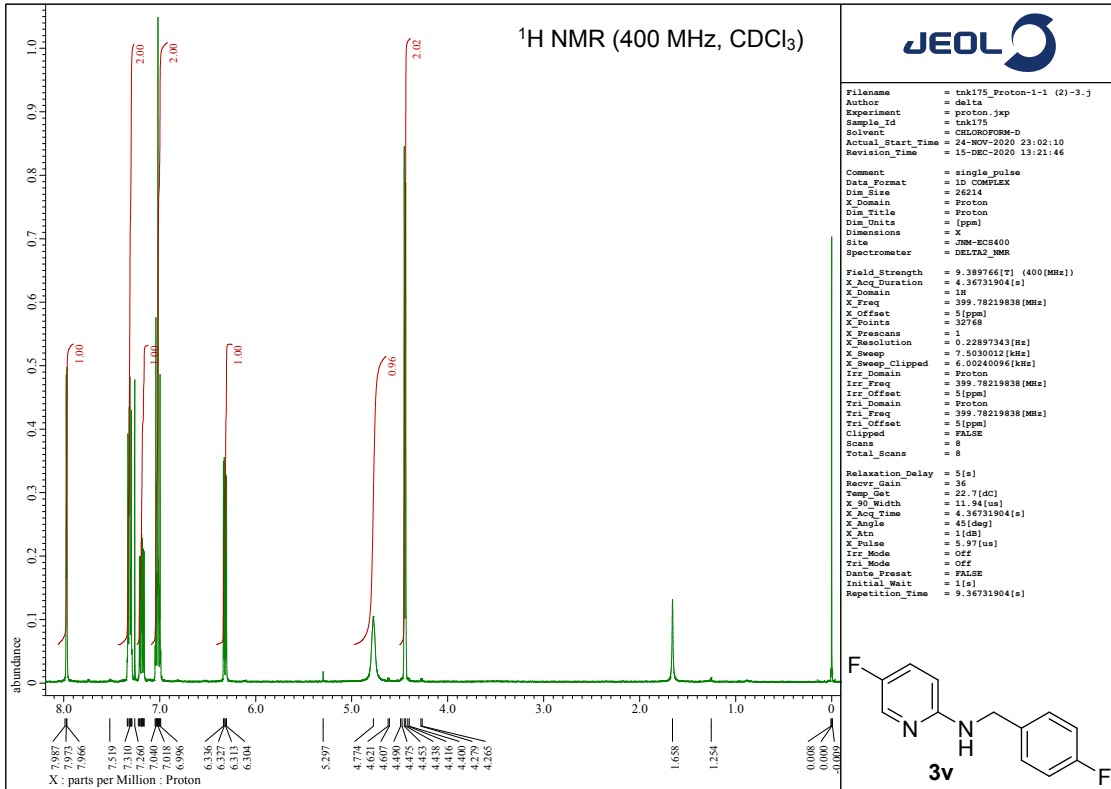

**JEOL**

```

Filename = tnk175_Proton-1-1 (2)-3.j
Author = delta
Experiment = proton_jxp
Sample_Id = tnk175
Solvent = CHLOROFORM-D
Actual_Start Time = 24-NOV-2020 23:02:10
Revision_Time = 15-DEC-2020 13:21:46

Comment = single pulse
Data Format = 1D COMPLEX
Dia_Size = 26214
X_Domain = Proton
Dia_Title = Proton
Dia_Units = [ppm]
Dimensions = X
Site = JNM-EC3400
Spectrometer = DELTA2_MMR

Field_Strength = 9.389766[T] (400[MHz])
X_Acq_Duration = 4.36731904[s]
X_Domain = 1H
X_Freq = 399.78219838[MHz]
X_Offset = 5[ppm]
X_Points = 32768
X_Frescosans = 1
X_Resolution = 0.22897343[Hz]
X_Sweep = 7.5030012[kHz]
X_Sweep_Clipped = 6.0240096[kHz]
Irr_Domain = Proton
Irr_Freq = 399.78219838[MHz]
Irr_Offset = 5[ppm]
Tri_Domain = Proton
Tri_Freq = 399.78219838[MHz]
Tri_Offset = 5[ppm]
Clipped = FALSE
Scans = 8
Total_Scans = 8

Relaxation_Delay = 5[s]
Recvr_Gain = 36
Temp_Set = 22.7[dc]
X_90_Width = 11.94[us]
X_Acq_Time = 4.36731904[s]
X_Angle = 45[deg]
X_Atn = 1[db]
X_Pulse = 5.37[us]
Irr_Mode = Off
Tri_Mode = Off
Date_Fresat = FALSE
Initial_Wait = 1[s]
Repetition_Time = 9.36731904[s]
    
```

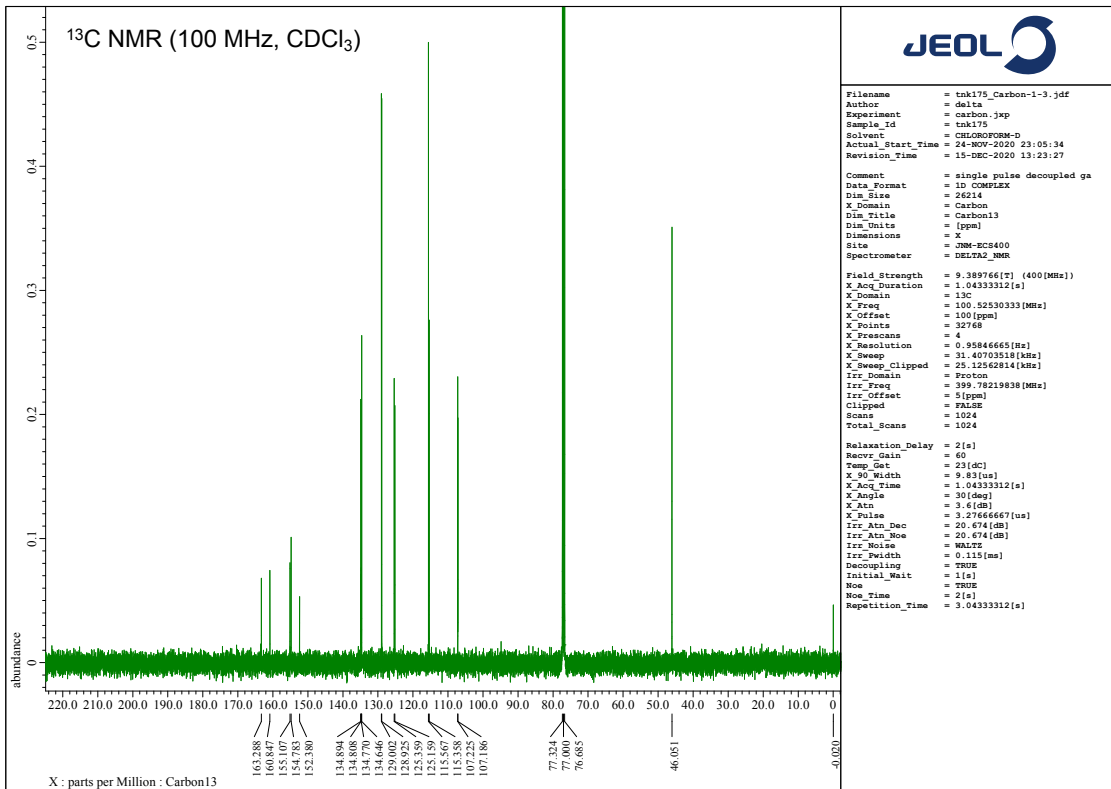

**JEOL**

```

Filename = tnk175_Carbon-1-3.jdf
Author = delta
Experiment = carbon_jxp
Sample_Id = tnk175
Solvent = CHLOROFORM-D
Actual_Start Time = 24-NOV-2020 23:05:34
Revision_Time = 15-DEC-2020 13:23:27

Comment = single pulse decoupled ga
Data Format = 1D COMPLEX
Dia_Size = 26214
X_Domain = Carbon
Dia_Title = Carbon13
Dia_Units = [ppm]
Dimensions = X
Site = JNM-EC3400
Spectrometer = DELTA2_MMR

Field_Strength = 9.389766[T] (400[MHz])
X_Acq_Duration = 1.04333312[s]
X_Domain = 13C
X_Freq = 100.52530333[MHz]
X_Offset = 100[ppm]
X_Points = 32768
X_Frescosans = 4
X_Resolution = 0.93846665[Hz]
X_Sweep = 21.40703181[kHz]
X_Sweep_Clipped = 25.12562814[kHz]
Irr_Domain = Proton
Irr_Freq = 399.78219838[MHz]
Irr_Offset = 5[ppm]
Tri_Domain = Proton
Tri_Freq = 399.78219838[MHz]
Tri_Offset = 5[ppm]
Clipped = FALSE
Scans = 1024
Total_Scans = 1024

Relaxation_Delay = 2[s]
Recvr_Gain = 60
Temp_Set = 23[dc]
X_90_Width = 9.83[us]
X_Acq_Time = 1.04333312[s]
X_Angle = 30[deg]
X_Atn = 3.6[db]
X_Pulse = 3.27646667[us]
Irr_Atn_Dec = 20.674[db]
Irr_Atn_Noise = 20.674[db]
Irr_Noise = WAIT
Irr_Width = 0.115[ms]
Decoupling = TRUE
Initial_Wait = 1[s]
Noe = TRUE
Noe_Time = 2[s]
Repetition_Time = 3.04333312[s]
    
```
